# Supplementary material for: Effect of ligand substituents in olefin polymerisation by half-sandwich titanium complexes containing monoanionic iminoimidazolidide ligands–MAO catalyst systems
Source: Royal Society of Chemistry journal article supplement (doi:10.1039/c1dt10467e), 2011-01-01
Supplement: c1dt10467e.pdf [file c1dt10467e.pdf]

Electronic Supplementary Information (ESI)

Effect of Ligand Substituents in Olefin Polymerisation by Half-Titanocenes Containing  
Monoanionic Iminoimidazolidide Ligands - MAO Catalyst Systems

*Kotohiro Nomura,<sup>a,b\*</sup> Hiroya Fukuda,<sup>b</sup> Shohei Katao,<sup>b</sup> Michiya Fujiki,<sup>b</sup> Hyun Joon Kim,<sup>c</sup>  
Dong-Hyun Kim,<sup>c</sup> and Shu Zhang<sup>b</sup>*

<sup>a</sup>Department of Chemistry, Tokyo Metropolitan University, 1-1 Minami Osawa, Hachioiji, Tokyo  
192-0397, Japan, <sup>b</sup>Graduate School of Materials Science, Nara Institute of Science and Technology,  
8916-5 Takayama, Ikoma, Nara 630-0101, Japan, <sup>c</sup>Korea Institute of Industrial Technology, 35-3  
Hongcheon-ri, Ipjang-myeon, Seobuk-gu, Cheonan-si, Chungnam, 331-825, Korea

\*Corresponding Author, tel.: +81-42-677-2547, fax: +81-42-677-2547, e-mail:  
[ktnomura@tmu.ac.jp](mailto:ktnomura@tmu.ac.jp)

X-ray Structure Report for  $\text{CpTiCl}_2[1,3-(2,6\text{-Me}_2\text{C}_6\text{H}_3)_2(\text{CH}_2\text{N})_2\text{C}=\text{N}]$  (**1b**)

January 19, 2011

## Experimental

### Data Collection

A yellow block crystal of  $C_{24}H_{27}Cl_2N_3Ti$  having approximate dimensions of 0.450 x 0.450 x 0.120 mm was mounted on a glass fiber. All measurements were made on a Rigaku R-AXIS RAPID diffractometer using graphite monochromated Mo-K $\alpha$  radiation.

The crystal-to-detector distance was 127.40 mm.

Cell constants and an orientation matrix for data collection corresponded to a primitive triclinic cell with dimensions:

$$\begin{array}{ll} a = 8.2728(3) \text{ \AA} & \alpha = 80.281(1)^\circ \\ b = 9.4651(4) \text{ \AA} & \beta = 82.631(1)^\circ \\ c = 16.8992(6) \text{ \AA} & \gamma = 62.550(1)^\circ \\ V = 1155.48(7) \text{ \AA}^3 & \end{array}$$

For  $Z = 2$  and F.W. = 476.30, the calculated density is 1.369 g/cm<sup>3</sup>. Based on a statistical analysis of intensity distribution, and the successful solution and refinement of the structure, the space group was determined to be:

P-1 (#2)

The data were collected at a temperature of  $-150 \pm 1^\circ\text{C}$  to a maximum  $2\theta$  value of  $54.9^\circ$ . A total of 74 oscillation images were collected. A sweep of data was done using  $\omega$  scans from  $130.0$  to  $190.0^\circ$  in  $3.0^\circ$  step, at  $\chi=45.0^\circ$  and  $\phi = 0.0^\circ$ . The exposure rate was 70.0 [sec./ $^\circ$ ]. A second sweep was performed using  $\omega$  scans from  $0.0$  to  $162.0^\circ$  in  $3.0^\circ$  step, at  $\chi=45.0^\circ$  and  $\phi = 180.0^\circ$ . The exposure rate was 70.0 [sec./ $^\circ$ ]. The crystal-to-detector distance was 127.40 mm. Readout was performed in the 0.100 mm pixel mode.

### Data Reduction

Of the 11559 reflections that were collected, 5250 were unique ( $R_{\text{int}} = 0.0284$ ); equivalent reflections were merged.

The linear absorption coefficient,  $\mu$ , for Mo-K $\alpha$  radiation is 6.173 cm<sup>-1</sup>. An empirical absorption correction was applied which resulted in transmission factors ranging from 0.693 to 0.929. The data were corrected for Lorentz and polarization effects.

### Structure Solution and Refinement

The structure was solved by direct methods<sup>1</sup> and expanded using Fourier techniques. The non-hydrogen atoms were refined anisotropically. Hydrogen atoms were refined using the riding model. The final cycle of full-matrix least-squares refinement<sup>2</sup> on  $F^2$  was based on 5250 observed reflections and 295 variable parameters and converged (largest parameter shift was 0.00 times its esd) with unweighted and weighted agreement factors of:

$$R1 = \sum ||F_o| - |F_c|| / \sum |F_o| = 0.0333$$

$$wR2 = [ \sum ( w (F_o^2 - F_c^2)^2 ) / \sum w(F_o^2)^2 ]^{1/2} = 0.0997$$

The standard deviation of an observation of unit weight<sup>3</sup> was 1.11. Unit weights were used. The maximum and minimum peaks on the final difference Fourier map corresponded to 0.38 and -0.52 e<sup>-</sup>/Å<sup>3</sup>, respectively.

Neutral atom scattering factors were taken from Cromer and Waber<sup>4</sup>. Anomalous dispersion effects were included in  $F_{\text{calc}}$ <sup>5</sup>; the values for  $\Delta f'$  and  $\Delta f''$  were those of Creagh and McAuley<sup>6</sup>. The values for the mass attenuation coefficients are those of Creagh and Hubbell<sup>7</sup>. All calculations were performed using the CrystalStructure<sup>8</sup> crystallographic software package except for refinement, which was performed using SHELXL-97<sup>9</sup>.

### References

(1) SIR2008: M.C. Burla, R. Caliandro, M. Camalli, B. Carrozzini, G.L. Cascarano, L. De Caro, C. Giacovazzo, G. Polidori, D. Siliqi, R. Spagna (2007)

(2) Least Squares function minimized: (SHELXL97)

$$\sum w(F_o^2 - F_c^2)^2 \quad \text{where } w = \text{Least Squares weights.}$$

(3) Standard deviation of an observation of unit weight:

$$[\sum w(F_o^2 - F_c^2)^2 / (N_o - N_v)]^{1/2}$$

where:  $N_o$  = number of observations  
 $N_v$  = number of variables

(4) Cromer, D. T. & Waber, J. T.; "International Tables for X-ray Crystallography", Vol. IV, The Kynoch Press, Birmingham, England, Table 2.2 A (1974).

(5) Ibers, J. A. & Hamilton, W. C.; Acta Crystallogr., 17, 781 (1964).

(6) Creagh, D. C. & McAuley, W.J. ; "International Tables for Crystallography", Vol C, (A.J.C. Wilson, ed.), Kluwer Academic Publishers, Boston, Table 4.2.6.8, pages 219-222 (1992).

(7) Creagh, D. C. & Hubbell, J.H.; "International Tables for Crystallography", Vol C, (A.J.C. Wilson, ed.), Kluwer Academic Publishers, Boston, Table 4.2.4.3, pages 200-206 (1992).

(8) CrystalStructure 4.0: Crystal Structure Analysis Package, Rigaku Corporation (2000-2010). Tokyo 196-8666, Japan.

(9) SHELX97: Sheldrick, G.M. (2008). Acta Cryst. A64, 112-122.

## EXPERIMENTAL DETAILS

### A. Crystal Data

|                      |                                                                                                                                                  |
|----------------------|--------------------------------------------------------------------------------------------------------------------------------------------------|
| Empirical Formula    | C <sub>24</sub> H <sub>27</sub> Cl <sub>2</sub> N <sub>3</sub> Ti                                                                                |
| Formula Weight       | 476.30                                                                                                                                           |
| Crystal Color, Habit | yellow, block                                                                                                                                    |
| Crystal Dimensions   | 0.450 X 0.450 X 0.120 mm                                                                                                                         |
| Crystal System       | triclinic                                                                                                                                        |
| Lattice Type         | Primitive                                                                                                                                        |
| Lattice Parameters   | a = 8.2728(3) Å<br>b = 9.4651(4) Å<br>c = 16.8992(6) Å<br>α = 80.281(1) °<br>β = 82.631(1) °<br>γ = 62.550(1) °<br>V = 1155.48(7) Å <sup>3</sup> |
| Space Group          | P-1 (#2)                                                                                                                                         |
| Z value              | 2                                                                                                                                                |
| D <sub>calc</sub>    | 1.369 g/cm <sup>3</sup>                                                                                                                          |
| F <sub>000</sub>     | 496.00                                                                                                                                           |
| μ(MoKα)              | 6.173 cm <sup>-1</sup>                                                                                                                           |

## B. Intensity Measurements

|                                                           |                                                                            |
|-----------------------------------------------------------|----------------------------------------------------------------------------|
| Diffractometer                                            | R-AXIS RAPID                                                               |
| Radiation                                                 | MoK $\alpha$ ( $\lambda = 0.71075 \text{ \AA}$ )<br>graphite monochromated |
| Voltage, Current                                          | 50kV, 30mA                                                                 |
| Temperature                                               | -150.0 $^{\circ}$ C                                                        |
| Detector Aperture                                         | 280 x 256 mm                                                               |
| Data Images                                               | 74 exposures                                                               |
| $\omega$ oscillation Range ( $\chi=45.0$ , $\phi=0.0$ )   | 130.0 - 190.0 $^{\circ}$                                                   |
| Exposure Rate                                             | 70.0 sec./ $^{\circ}$                                                      |
| $\omega$ oscillation Range ( $\chi=45.0$ , $\phi=180.0$ ) | 0.0 - 162.0 $^{\circ}$                                                     |
| Exposure Rate                                             | 70.0 sec./ $^{\circ}$                                                      |
| Detector Position                                         | 127.40 mm                                                                  |
| Pixel Size                                                | 0.100 mm                                                                   |
| $2\theta_{\max}$                                          | 54.9 $^{\circ}$                                                            |
| No. of Reflections Measured                               | Total: 11559<br>Unique: 5250 ( $R_{\text{int}} = 0.0284$ )                 |
| Corrections                                               | Lorentz-polarization<br>Absorption<br>(trans. factors: 0.693 - 0.929)      |

### C. Structure Solution and Refinement

|                                       |                                                                                                                      |
|---------------------------------------|----------------------------------------------------------------------------------------------------------------------|
| Structure Solution                    | Direct Methods                                                                                                       |
| Refinement                            | Full-matrix least-squares on F <sup>2</sup>                                                                          |
| Function Minimized                    | $\sum w (F_o^2 - F_c^2)^2$                                                                                           |
| Least Squares Weights                 | $w = 1 / [ \sigma^2(F_o^2) + (0.0452 \cdot P)^2 + 0.7158 \cdot P ]$<br>where $P = (\text{Max}(F_o^2, 0) + 2F_c^2)/3$ |
| 2 $\theta_{\text{max}}$ cutoff        | 54.9°                                                                                                                |
| Anomalous Dispersion                  | All non-hydrogen atoms                                                                                               |
| No. Observations (All reflections)    | 5250                                                                                                                 |
| No. Variables                         | 295                                                                                                                  |
| Reflection/Parameter Ratio            | 17.80                                                                                                                |
| Residuals: R1 ( $I > 2.00\sigma(I)$ ) | 0.0333                                                                                                               |
| Residuals: R (All reflections)        | 0.0429                                                                                                               |
| Residuals: wR2 (All reflections)      | 0.0997                                                                                                               |
| Goodness of Fit Indicator             | 1.112                                                                                                                |
| Max Shift/Error in Final Cycle        | 0.001                                                                                                                |
| Maximum peak in Final Diff. Map       | 0.38 e <sup>-</sup> /Å <sup>3</sup>                                                                                  |
| Minimum peak in Final Diff. Map       | -0.52 e <sup>-</sup> /Å <sup>3</sup>                                                                                 |



Table 1. Atomic coordinates and  $B_{iso}/B_{eq}$

| atom | x          | y           | z          | $B_{eq}$ |
|------|------------|-------------|------------|----------|
| Ti1  | 0.33380(4) | -0.13443(4) | 0.77131(2) | 1.349(7) |
| Cl1  | 0.62540(6) | -0.18322(6) | 0.79403(3) | 1.94(1)  |
| Cl2  | 0.39779(7) | -0.30405(6) | 0.67574(3) | 2.33(1)  |
| N1   | 0.2446(2)  | 0.0649(2)   | 0.71980(9) | 1.43(3)  |
| N2   | 0.1296(3)  | 0.3296(2)   | 0.75414(9) | 1.63(3)  |
| N3   | 0.0901(3)  | 0.3030(2)   | 0.63220(9) | 1.65(3)  |
| C1   | 0.3287(3)  | -0.2709(3)  | 0.9046(2)  | 2.26(4)  |
| C2   | 0.2280(3)  | -0.1038(3)  | 0.9067(1)  | 2.13(4)  |
| C3   | 0.0752(3)  | -0.0482(3)  | 0.8615(2)  | 2.26(4)  |
| C4   | 0.0833(3)  | -0.1802(3)  | 0.8290(2)  | 2.34(4)  |
| C5   | 0.2390(4)  | -0.3172(3)  | 0.8572(2)  | 2.44(4)  |
| C6   | 0.1605(3)  | 0.2212(2)   | 0.7033(1)  | 1.28(3)  |
| C7   | 0.0566(3)  | 0.4940(3)   | 0.7126(1)  | 1.95(3)  |
| C8   | -0.0066(3) | 0.4765(3)   | 0.6351(2)  | 2.15(4)  |
| C9   | 0.1961(3)  | 0.2914(2)   | 0.8329(1)  | 1.60(3)  |
| C10  | 0.3817(3)  | 0.2392(3)   | 0.8413(1)  | 1.86(3)  |
| C11  | 0.4419(3)  | 0.2036(3)   | 0.9190(2)  | 2.48(4)  |
| C12  | 0.3198(4)  | 0.2235(3)   | 0.9853(2)  | 2.77(4)  |
| C13  | 0.1371(4)  | 0.2809(3)   | 0.9757(2)  | 2.68(4)  |
| C14  | 0.0697(3)  | 0.3163(3)   | 0.8991(1)  | 2.05(4)  |
| C15  | 0.5124(3)  | 0.2255(3)   | 0.7688(2)  | 2.37(4)  |
| C16  | -0.1317(3) | 0.3817(3)   | 0.8901(2)  | 2.86(4)  |
| C17  | 0.0999(3)  | 0.2376(2)   | 0.5601(1)  | 1.53(3)  |
| C18  | -0.0521(3) | 0.2265(3)   | 0.5411(2)  | 2.12(4)  |
| C19  | -0.0455(4) | 0.1783(3)   | 0.4666(2)  | 2.77(4)  |
| C20  | 0.1064(4)  | 0.1429(3)   | 0.4144(2)  | 2.90(5)  |
| C21  | 0.2560(4)  | 0.1547(3)   | 0.4348(2)  | 2.60(4)  |
| C22  | 0.2545(3)  | 0.2044(3)   | 0.5079(1)  | 1.92(3)  |
| C23  | -0.2166(4) | 0.2639(4)   | 0.5989(2)  | 3.45(5)  |
| C24  | 0.4088(3)  | 0.2306(3)   | 0.5292(2)  | 2.95(4)  |

$$B_{eq} = 8/3 \pi^2 (U_{11}(aa^*)^2 + U_{22}(bb^*)^2 + U_{33}(cc^*)^2 + 2U_{12}(aa^*bb^*)\cos \gamma + 2U_{13}(aa^*cc^*)\cos \beta + 2U_{23}(bb^*cc^*)\cos \alpha)$$

Table 2. Atomic coordinates and  $B_{\text{iso}}$  involving hydrogen atoms

| atom | x       | y       | z      | $B_{\text{iso}}$ |
|------|---------|---------|--------|------------------|
| H1   | 0.4451  | -0.3404 | 0.9267 | 3.22             |
| H2   | 0.2638  | -0.0361 | 0.9290 | 2.90             |
| H3   | -0.0162 | 0.0580  | 0.8536 | 3.19             |
| H4   | 0.0066  | -0.1738 | 0.7965 | 2.61             |
| H5   | 0.2832  | -0.4228 | 0.8449 | 3.26             |
| H6   | 0.1521  | 0.5313  | 0.7009 | 2.34             |
| H7   | -0.0465 | 0.5695  | 0.7445 | 2.34             |
| H8   | -0.1405 | 0.5157  | 0.6379 | 2.58             |
| H9   | 0.0289  | 0.5355  | 0.5877 | 2.58             |
| H10  | 0.5678  | 0.1652  | 0.9264 | 2.97             |
| H11  | 0.3628  | 0.1973  | 1.0378 | 3.33             |
| H12  | 0.0547  | 0.2969  | 1.0218 | 3.22             |
| H13  | 0.4703  | 0.3293  | 0.7349 | 2.84             |
| H14  | 0.5176  | 0.1445  | 0.7379 | 2.84             |
| H15  | 0.6341  | 0.1936  | 0.7863 | 2.84             |
| H16  | -0.1511 | 0.3516  | 0.8408 | 3.43             |
| H17  | -0.1898 | 0.4989  | 0.8873 | 3.43             |
| H18  | -0.1854 | 0.3372  | 0.9365 | 3.43             |
| H19  | -0.1473 | 0.1698  | 0.4517 | 3.32             |
| H20  | 0.1084  | 0.1101  | 0.3641 | 3.48             |
| H21  | 0.3606  | 0.1287  | 0.3985 | 3.12             |
| H22  | -0.2818 | 0.2052  | 0.5889 | 4.13             |
| H23  | -0.2977 | 0.3795  | 0.5914 | 4.13             |
| H24  | -0.1774 | 0.2315  | 0.6542 | 4.13             |
| H25  | 0.3663  | 0.3451  | 0.5317 | 3.54             |
| H26  | 0.5093  | 0.1939  | 0.4881 | 3.54             |
| H27  | 0.4514  | 0.1699  | 0.5816 | 3.54             |

Table 3. Anisotropic displacement parameters

| atom | U <sub>11</sub> | U <sub>22</sub> | U <sub>33</sub> | U <sub>12</sub> | U <sub>13</sub> | U <sub>23</sub> |
|------|-----------------|-----------------|-----------------|-----------------|-----------------|-----------------|
| Ti1  | 0.0197(2)       | 0.0169(2)       | 0.0134(2)       | -0.0074(2)      | -0.0020(1)      | -0.0003(1)      |
| Cl1  | 0.0186(3)       | 0.0287(3)       | 0.0219(3)       | -0.0066(2)      | -0.0047(2)      | -0.0011(2)      |
| Cl2  | 0.0422(3)       | 0.0295(3)       | 0.0210(3)       | -0.0186(3)      | 0.0012(2)       | -0.0091(2)      |
| N1   | 0.0205(8)       | 0.0195(8)       | 0.0138(7)       | -0.0087(7)      | -0.0039(6)      | 0.0003(6)       |
| N2   | 0.0286(9)       | 0.0144(7)       | 0.0147(8)       | -0.0061(7)      | -0.0049(6)      | 0.0009(6)       |
| N3   | 0.0284(9)       | 0.0157(8)       | 0.0152(8)       | -0.0066(7)      | -0.0072(6)      | 0.0018(6)       |
| C1   | 0.034(1)        | 0.030(1)        | 0.0167(9)       | -0.013(1)       | -0.0003(8)      | 0.0053(8)       |
| C2   | 0.036(2)        | 0.031(1)        | 0.0163(9)       | -0.018(1)       | 0.0048(8)       | -0.0047(8)      |
| C3   | 0.027(1)        | 0.027(1)        | 0.026(1)        | -0.0094(9)      | 0.0062(8)       | -0.0017(8)      |
| C4   | 0.030(1)        | 0.045(2)        | 0.024(1)        | -0.027(1)       | 0.0018(8)       | -0.0006(9)      |
| C5   | 0.046(2)        | 0.028(1)        | 0.024(1)        | -0.024(1)       | 0.0089(9)       | -0.0038(8)      |
| C6   | 0.0148(8)       | 0.0202(9)       | 0.0134(8)       | -0.0081(7)      | -0.0016(6)      | 0.0003(7)       |
| C7   | 0.034(1)        | 0.0160(9)       | 0.0197(9)       | -0.0073(8)      | -0.0049(8)      | 0.0010(7)       |
| C8   | 0.037(1)        | 0.0165(9)       | 0.022(1)        | -0.0069(9)      | -0.0084(8)      | 0.0019(7)       |
| C9   | 0.030(1)        | 0.0172(9)       | 0.0144(9)       | -0.0105(8)      | -0.0033(7)      | -0.0013(7)      |
| C10  | 0.029(1)        | 0.0210(9)       | 0.0205(9)       | -0.0111(8)      | -0.0038(8)      | -0.0003(7)      |
| C11  | 0.039(2)        | 0.031(1)        | 0.027(1)        | -0.017(1)       | -0.0129(9)      | -0.0010(9)      |
| C12  | 0.056(2)        | 0.033(2)        | 0.018(1)        | -0.019(1)       | -0.013(1)       | -0.0014(8)      |
| C13  | 0.053(2)        | 0.029(1)        | 0.016(1)        | -0.016(1)       | 0.0050(9)       | -0.0040(8)      |
| C14  | 0.034(1)        | 0.020(1)        | 0.020(1)        | -0.0103(9)      | 0.0015(8)       | -0.0009(7)      |
| C15  | 0.027(1)        | 0.032(1)        | 0.030(1)        | -0.0138(9)      | -0.0013(8)      | 0.0001(9)       |
| C16  | 0.032(2)        | 0.032(2)        | 0.034(2)        | -0.009(1)       | 0.0066(9)       | -0.0007(9)      |
| C17  | 0.0258(9)       | 0.0181(9)       | 0.0126(8)       | -0.0090(8)      | -0.0061(7)      | 0.0029(7)       |
| C18  | 0.032(1)        | 0.026(1)        | 0.025(1)        | -0.0161(9)      | -0.0060(8)      | 0.0029(8)       |
| C19  | 0.052(2)        | 0.033(2)        | 0.031(2)        | -0.026(1)       | -0.020(1)       | 0.0039(9)       |
| C20  | 0.069(2)        | 0.025(1)        | 0.018(1)        | -0.022(1)       | -0.010(1)       | 0.0008(8)       |
| C21  | 0.046(2)        | 0.020(1)        | 0.021(1)        | -0.007(1)       | 0.0045(9)       | 0.0005(8)       |
| C22  | 0.025(1)        | 0.0190(9)       | 0.021(1)        | -0.0054(8)      | -0.0032(8)      | 0.0037(7)       |
| C23  | 0.036(2)        | 0.052(2)        | 0.051(2)        | -0.028(2)       | 0.004(1)        | -0.008(2)       |
| C24  | 0.025(1)        | 0.039(2)        | 0.041(2)        | -0.012(1)       | -0.0008(9)      | 0.001(1)        |

The general temperature factor expression:  $\exp(-2\pi^2(a^2U_{11}h^2 + b^2U_{22}k^2 + c^2U_{33}l^2 + 2a*b*U_{12}hk + 2a*c*U_{13}hl + 2b*c*U_{23}kl))$

Table 4. Bond lengths (Å)

| atom | atom | distance   | atom | atom | distance  |
|------|------|------------|------|------|-----------|
| Ti1  | Cl1  | 2.3088(7)  | Ti1  | Cl2  | 2.3106(7) |
| Ti1  | N1   | 1.7860(15) | Ti1  | C1   | 2.406(2)  |
| Ti1  | C2   | 2.3586(19) | Ti1  | C3   | 2.354(2)  |
| Ti1  | C4   | 2.367(3)   | Ti1  | C5   | 2.414(3)  |
| N1   | C6   | 1.308(3)   | N2   | C6   | 1.362(3)  |
| N2   | C7   | 1.468(3)   | N2   | C9   | 1.430(3)  |
| N3   | C6   | 1.353(3)   | N3   | C8   | 1.465(3)  |
| N3   | C17  | 1.434(3)   | C1   | C2   | 1.412(3)  |
| C1   | C5   | 1.398(4)   | C2   | C3   | 1.399(4)  |
| C3   | C4   | 1.419(4)   | C4   | C5   | 1.406(3)  |
| C7   | C8   | 1.531(4)   | C9   | C10  | 1.398(3)  |
| C9   | C14  | 1.400(3)   | C10  | C11  | 1.397(3)  |
| C10  | C15  | 1.507(3)   | C11  | C12  | 1.385(3)  |
| C12  | C13  | 1.372(4)   | C13  | C14  | 1.403(3)  |
| C14  | C16  | 1.505(4)   | C17  | C18  | 1.391(4)  |
| C17  | C22  | 1.395(3)   | C18  | C19  | 1.395(4)  |
| C18  | C23  | 1.504(4)   | C19  | C20  | 1.377(4)  |
| C20  | C21  | 1.382(5)   | C21  | C22  | 1.391(4)  |
| C22  | C24  | 1.504(4)   |      |      |           |

Table 5. Bond lengths involving hydrogens (Å)

| atom | atom | distance | atom | atom | distance |
|------|------|----------|------|------|----------|
| C1   | H1   | 0.962    | C2   | H2   | 0.962    |
| C3   | H3   | 0.938    | C4   | H4   | 0.866    |
| C5   | H5   | 0.943    | C7   | H6   | 0.990    |
| C7   | H7   | 0.990    | C8   | H8   | 0.990    |
| C8   | H9   | 0.990    | C11  | H10  | 0.950    |
| C12  | H11  | 0.950    | C13  | H12  | 0.950    |
| C15  | H13  | 0.980    | C15  | H14  | 0.980    |
| C15  | H15  | 0.980    | C16  | H16  | 0.980    |
| C16  | H17  | 0.980    | C16  | H18  | 0.980    |
| C19  | H19  | 0.950    | C20  | H20  | 0.950    |
| C21  | H21  | 0.950    | C23  | H22  | 0.980    |
| C23  | H23  | 0.980    | C23  | H24  | 0.980    |
| C24  | H25  | 0.980    | C24  | H26  | 0.980    |
| C24  | H27  | 0.980    |      |      |          |

Table 6. Bond angles (°)

| atom | atom | atom | angle      | atom | atom | atom | angle      |
|------|------|------|------------|------|------|------|------------|
| Cl1  | Ti1  | Cl2  | 100.27(3)  | Cl1  | Ti1  | N1   | 101.84(7)  |
| Cl1  | Ti1  | C1   | 86.21(7)   | Cl1  | Ti1  | C2   | 93.72(7)   |
| Cl1  | Ti1  | C3   | 127.25(7)  | Cl1  | Ti1  | C4   | 143.13(6)  |
| Cl1  | Ti1  | C5   | 112.22(6)  | Cl2  | Ti1  | N1   | 106.80(6)  |
| Cl2  | Ti1  | C1   | 110.72(7)  | Cl2  | Ti1  | C2   | 141.55(7)  |
| Cl2  | Ti1  | C3   | 126.19(8)  | Cl2  | Ti1  | C4   | 92.07(7)   |
| Cl2  | Ti1  | C5   | 84.69(6)   | N1   | Ti1  | C1   | 139.47(7)  |
| N1   | Ti1  | C2   | 105.02(7)  | N1   | Ti1  | C3   | 88.45(7)   |
| N1   | Ti1  | C4   | 107.62(8)  | N1   | Ti1  | C5   | 141.56(8)  |
| C1   | Ti1  | C2   | 34.46(7)   | C1   | Ti1  | C3   | 57.06(7)   |
| C1   | Ti1  | C4   | 56.96(9)   | C1   | Ti1  | C5   | 33.73(10)  |
| C2   | Ti1  | C3   | 34.54(8)   | C2   | Ti1  | C4   | 57.74(10)  |
| C2   | Ti1  | C5   | 56.89(9)   | C3   | Ti1  | C4   | 34.99(10)  |
| C3   | Ti1  | C5   | 57.02(8)   | C4   | Ti1  | C5   | 34.20(7)   |
| Ti1  | N1   | C6   | 163.23(14) | C6   | N2   | C7   | 111.70(15) |
| C6   | N2   | C9   | 125.44(14) | C7   | N2   | C9   | 121.42(18) |
| C6   | N3   | C8   | 112.08(17) | C6   | N3   | C17  | 127.34(15) |
| C8   | N3   | C17  | 120.57(14) | Ti1  | C1   | C2   | 70.95(11)  |
| Ti1  | C1   | C5   | 73.45(13)  | C2   | C1   | C5   | 108.03(19) |
| Ti1  | C2   | C1   | 74.60(12)  | Ti1  | C2   | C3   | 72.55(12)  |
| C1   | C2   | C3   | 108.0(3)   | Ti1  | C3   | C2   | 72.92(12)  |
| Ti1  | C3   | C4   | 73.00(13)  | C2   | C3   | C4   | 108.11(18) |
| Ti1  | C4   | C3   | 72.01(15)  | Ti1  | C4   | C5   | 74.73(16)  |
| C3   | C4   | C5   | 107.3(3)   | Ti1  | C5   | C1   | 72.82(15)  |
| Ti1  | C5   | C4   | 71.08(15)  | C1   | C5   | C4   | 108.5(3)   |
| N1   | C6   | N2   | 126.13(16) | N1   | C6   | N3   | 125.64(19) |
| N2   | C6   | N3   | 108.23(15) | N2   | C7   | C8   | 102.13(18) |
| N3   | C8   | C7   | 102.52(15) | N2   | C9   | C10  | 119.42(16) |
| N2   | C9   | C14  | 118.23(18) | C10  | C9   | C14  | 122.25(18) |
| C9   | C10  | C11  | 117.95(18) | C9   | C10  | C15  | 121.15(18) |
| C11  | C10  | C15  | 120.9(2)   | C10  | C11  | C12  | 120.6(3)   |
| C11  | C12  | C13  | 120.5(2)   | C12  | C13  | C14  | 121.2(2)   |
| C9   | C14  | C13  | 117.4(2)   | C9   | C14  | C16  | 122.49(19) |
| C13  | C14  | C16  | 120.10(19) | N3   | C17  | C18  | 118.71(17) |
| N3   | C17  | C22  | 118.2(2)   | C18  | C17  | C22  | 122.72(19) |
| C17  | C18  | C19  | 117.4(2)   | C17  | C18  | C23  | 121.1(3)   |
| C19  | C18  | C23  | 121.5(3)   | C18  | C19  | C20  | 121.0(3)   |

Table 6. Bond angles ( $^{\circ}$ ) (continued)

| atom | atom | atom | angle    | atom | atom | atom | angle    |
|------|------|------|----------|------|------|------|----------|
| C19  | C20  | C21  | 120.6(3) | C20  | C21  | C22  | 120.4(2) |
| C17  | C22  | C21  | 117.9(3) | C17  | C22  | C24  | 120.3(2) |
| C21  | C22  | C24  | 121.8(2) |      |      |      |          |

Table 7. Bond angles involving hydrogens (°)

| atom | atom | atom | angle | atom | atom | atom | angle |
|------|------|------|-------|------|------|------|-------|
| Ti1  | C1   | H1   | 116.5 | C2   | C1   | H1   | 126.8 |
| C5   | C1   | H1   | 124.9 | Ti1  | C2   | H2   | 112.8 |
| C1   | C2   | H2   | 126.9 | C3   | C2   | H2   | 124.7 |
| Ti1  | C3   | H3   | 119.5 | C2   | C3   | H3   | 126.1 |
| C4   | C3   | H3   | 125.8 | Ti1  | C4   | H4   | 117.2 |
| C3   | C4   | H4   | 124.8 | C5   | C4   | H4   | 127.9 |
| Ti1  | C5   | H5   | 119.3 | C1   | C5   | H5   | 123.8 |
| C4   | C5   | H5   | 127.6 | N2   | C7   | H6   | 111.3 |
| N2   | C7   | H7   | 111.3 | C8   | C7   | H6   | 111.3 |
| C8   | C7   | H7   | 111.3 | H6   | C7   | H7   | 109.2 |
| N3   | C8   | H8   | 111.3 | N3   | C8   | H9   | 111.3 |
| C7   | C8   | H8   | 111.3 | C7   | C8   | H9   | 111.3 |
| H8   | C8   | H9   | 109.2 | C10  | C11  | H10  | 119.7 |
| C12  | C11  | H10  | 119.7 | C11  | C12  | H11  | 119.7 |
| C13  | C12  | H11  | 119.7 | C12  | C13  | H12  | 119.4 |
| C14  | C13  | H12  | 119.4 | C10  | C15  | H13  | 109.5 |
| C10  | C15  | H14  | 109.5 | C10  | C15  | H15  | 109.5 |
| H13  | C15  | H14  | 109.5 | H13  | C15  | H15  | 109.5 |
| H14  | C15  | H15  | 109.5 | C14  | C16  | H16  | 109.5 |
| C14  | C16  | H17  | 109.5 | C14  | C16  | H18  | 109.5 |
| H16  | C16  | H17  | 109.5 | H16  | C16  | H18  | 109.5 |
| H17  | C16  | H18  | 109.5 | C18  | C19  | H19  | 119.5 |
| C20  | C19  | H19  | 119.5 | C19  | C20  | H20  | 119.7 |
| C21  | C20  | H20  | 119.7 | C20  | C21  | H21  | 119.8 |
| C22  | C21  | H21  | 119.8 | C18  | C23  | H22  | 109.5 |
| C18  | C23  | H23  | 109.5 | C18  | C23  | H24  | 109.5 |
| H22  | C23  | H23  | 109.5 | H22  | C23  | H24  | 109.5 |
| H23  | C23  | H24  | 109.5 | C22  | C24  | H25  | 109.5 |
| C22  | C24  | H26  | 109.5 | C22  | C24  | H27  | 109.5 |
| H25  | C24  | H26  | 109.5 | H25  | C24  | H27  | 109.5 |
| H26  | C24  | H27  | 109.5 |      |      |      |       |



Table 8. Torsion Angles(°)  
 (Those having bond angles > 160 or < 20 degrees are excluded.)

| atom1 | atom2 | atom3 | atom4 | angle       | atom1 | atom2 | atom3 | atom4 | angle       |
|-------|-------|-------|-------|-------------|-------|-------|-------|-------|-------------|
| Cl1   | Ti1   | C1    | C2    | 102.21(11)  | Cl1   | Ti1   | C1    | C5    | -141.42(7)  |
| Cl1   | Ti1   | C2    | C1    | -77.77(10)  | Cl1   | Ti1   | C2    | C3    | 167.26(9)   |
| Cl1   | Ti1   | C3    | C2    | -16.05(14)  | Cl1   | Ti1   | C3    | C4    | -131.77(7)  |
| Cl1   | Ti1   | C4    | C3    | 81.64(11)   | Cl1   | Ti1   | C4    | C5    | -32.79(17)  |
| Cl1   | Ti1   | C5    | C1    | 42.23(9)    | Cl1   | Ti1   | C5    | C4    | 159.45(7)   |
| Cl2   | Ti1   | C1    | C2    | -158.24(8)  | Cl2   | Ti1   | C1    | C5    | -41.86(9)   |
| Cl2   | Ti1   | C2    | C1    | 33.90(16)   | Cl2   | Ti1   | C2    | C3    | -81.07(10)  |
| Cl2   | Ti1   | C3    | C2    | 130.44(9)   | Cl2   | Ti1   | C3    | C4    | 14.73(10)   |
| Cl2   | Ti1   | C4    | C3    | -168.15(7)  | Cl2   | Ti1   | C4    | C5    | 77.42(10)   |
| Cl2   | Ti1   | C5    | C1    | 141.18(8)   | Cl2   | Ti1   | C5    | C4    | -101.60(9)  |
| N1    | Ti1   | C1    | C2    | -1.6(2)     | N1    | Ti1   | C1    | C5    | 114.76(14)  |
| N1    | Ti1   | C2    | C1    | 178.91(11)  | N1    | Ti1   | C2    | C3    | 63.94(13)   |
| N1    | Ti1   | C3    | C2    | -119.78(12) | N1    | Ti1   | C3    | C4    | 124.50(10)  |
| N1    | Ti1   | C4    | C3    | -59.80(11)  | N1    | Ti1   | C4    | C5    | -174.23(10) |
| N1    | Ti1   | C5    | C1    | -108.35(14) | N1    | Ti1   | C5    | C4    | 8.87(19)    |
| C1    | Ti1   | C2    | C1    | 0.00(12)    | C1    | Ti1   | C2    | C3    | -115.0(2)   |
| C2    | Ti1   | C1    | C2    | -0.00(12)   | C2    | Ti1   | C1    | C5    | 116.37(18)  |
| C1    | Ti1   | C3    | C2    | 37.67(10)   | C1    | Ti1   | C3    | C4    | -78.04(11)  |
| C3    | Ti1   | C1    | C2    | -37.76(11)  | C3    | Ti1   | C1    | C5    | 78.61(12)   |
| C1    | Ti1   | C4    | C3    | 78.34(11)   | C1    | Ti1   | C4    | C5    | -36.09(9)   |
| C4    | Ti1   | C1    | C2    | -79.78(11)  | C4    | Ti1   | C1    | C5    | 36.60(9)    |
| C1    | Ti1   | C5    | C1    | 0.00(8)     | C1    | Ti1   | C5    | C4    | 117.22(15)  |
| C5    | Ti1   | C1    | C2    | -116.37(16) | C5    | Ti1   | C1    | C5    | 0.00(9)     |
| C2    | Ti1   | C3    | C2    | 0.00(11)    | C2    | Ti1   | C3    | C4    | -115.72(17) |
| C3    | Ti1   | C2    | C1    | 115.0(2)    | C3    | Ti1   | C2    | C3    | 0.00(12)    |
| C2    | Ti1   | C4    | C3    | 37.16(8)    | C2    | Ti1   | C4    | C5    | -77.27(11)  |
| C4    | Ti1   | C2    | C1    | 77.31(12)   | C4    | Ti1   | C2    | C3    | -37.66(9)   |
| C2    | Ti1   | C5    | C1    | -37.24(8)   | C2    | Ti1   | C5    | C4    | 79.98(10)   |
| C5    | Ti1   | C2    | C1    | 36.43(10)   | C5    | Ti1   | C2    | C3    | -78.54(12)  |
| C3    | Ti1   | C4    | C3    | 0.00(8)     | C3    | Ti1   | C4    | C5    | -114.43(16) |
| C4    | Ti1   | C3    | C2    | 115.72(15)  | C4    | Ti1   | C3    | C4    | 0.00(9)     |
| C3    | Ti1   | C5    | C1    | -78.72(11)  | C3    | Ti1   | C5    | C4    | 38.50(9)    |
| C5    | Ti1   | C3    | C2    | 78.13(11)   | C5    | Ti1   | C3    | C4    | -37.59(9)   |
| C4    | Ti1   | C5    | C1    | -117.22(17) | C4    | Ti1   | C5    | C4    | 0.00(12)    |
| C5    | Ti1   | C4    | C3    | 114.43(18)  | C5    | Ti1   | C4    | C5    | 0.00(11)    |
| C6    | N2    | C7    | C8    | 16.5(2)     | C7    | N2    | C6    | N1    | 171.36(18)  |
| C7    | N2    | C6    | N3    | -8.3(3)     | C6    | N2    | C9    | C10   | 72.0(3)     |

Table 8. Torsion angles ( $^{\circ}$ ) (continued)

| atom1 | atom2 | atom3 | atom4 | angle       | atom1 | atom2 | atom3 | atom4 | angle       |
|-------|-------|-------|-------|-------------|-------|-------|-------|-------|-------------|
| C6    | N2    | C9    | C14   | -111.4(2)   | C9    | N2    | C6    | N1    | 5.0(4)      |
| C9    | N2    | C6    | N3    | -174.62(18) | C7    | N2    | C9    | C10   | -93.1(2)    |
| C7    | N2    | C9    | C14   | 83.4(3)     | C9    | N2    | C7    | C8    | -176.54(15) |
| C6    | N3    | C8    | C7    | 14.2(3)     | C8    | N3    | C6    | N1    | 175.95(18)  |
| C8    | N3    | C6    | N2    | -4.4(3)     | C6    | N3    | C17   | C18   | 101.7(2)    |
| C6    | N3    | C17   | C22   | -85.2(3)    | C17   | N3    | C6    | N1    | -3.2(4)     |
| C17   | N3    | C6    | N2    | 176.43(18)  | C8    | N3    | C17   | C18   | -77.4(3)    |
| C8    | N3    | C17   | C22   | 95.7(2)     | C17   | N3    | C8    | C7    | -166.56(17) |
| Ti1   | C1    | C2    | Ti1   | 0.0         | Ti1   | C1    | C2    | C3    | 65.39(12)   |
| Ti1   | C1    | C5    | Ti1   | 0.0         | Ti1   | C1    | C5    | C4    | -62.52(13)  |
| C2    | C1    | C5    | Ti1   | 62.94(16)   | C2    | C1    | C5    | C4    | 0.4(3)      |
| C5    | C1    | C2    | Ti1   | -64.57(16)  | C5    | C1    | C2    | C3    | 0.8(3)      |
| Ti1   | C2    | C3    | Ti1   | 0.000(10)   | Ti1   | C2    | C3    | C4    | 65.02(12)   |
| C1    | C2    | C3    | Ti1   | -66.75(15)  | C1    | C2    | C3    | C4    | -1.7(3)     |
| Ti1   | C3    | C4    | Ti1   | 0.0         | Ti1   | C3    | C4    | C5    | 66.95(13)   |
| C2    | C3    | C4    | Ti1   | -64.97(16)  | C2    | C3    | C4    | C5    | 2.0(3)      |
| Ti1   | C4    | C5    | Ti1   | 0.0         | Ti1   | C4    | C5    | C1    | 63.64(14)   |
| C3    | C4    | C5    | Ti1   | -65.12(17)  | C3    | C4    | C5    | C1    | -1.5(3)     |
| N2    | C7    | C8    | N3    | -17.35(19)  | N2    | C9    | C10   | C11   | 179.76(17)  |
| N2    | C9    | C10   | C15   | 1.1(3)      | N2    | C9    | C14   | C13   | -178.88(17) |
| N2    | C9    | C14   | C16   | -0.2(3)     | C10   | C9    | C14   | C13   | -2.4(3)     |
| C10   | C9    | C14   | C16   | 176.27(18)  | C14   | C9    | C10   | C11   | 3.3(3)      |
| C14   | C9    | C10   | C15   | -175.29(18) | C9    | C10   | C11   | C12   | -1.6(4)     |
| C15   | C10   | C11   | C12   | 177.0(2)    | C10   | C11   | C12   | C13   | -0.9(4)     |
| C11   | C12   | C13   | C14   | 1.9(4)      | C12   | C13   | C14   | C9    | -0.2(4)     |
| C12   | C13   | C14   | C16   | -179.0(2)   | N3    | C17   | C18   | C19   | 173.45(14)  |
| N3    | C17   | C18   | C23   | -7.0(3)     | N3    | C17   | C22   | C21   | -174.34(13) |
| N3    | C17   | C22   | C24   | 2.5(3)      | C18   | C17   | C22   | C21   | -1.5(3)     |
| C18   | C17   | C22   | C24   | 175.32(15)  | C22   | C17   | C18   | C19   | 0.7(3)      |
| C22   | C17   | C18   | C23   | -179.76(15) | C17   | C18   | C19   | C20   | 0.2(3)      |
| C23   | C18   | C19   | C20   | -179.39(18) | C18   | C19   | C20   | C21   | -0.1(3)     |
| C19   | C20   | C21   | C22   | -0.8(3)     | C20   | C21   | C22   | C17   | 1.5(3)      |
| C20   | C21   | C22   | C24   | -175.25(16) |       |       |       |       |             |

Table 9. Intramolecular contacts less than 3.60 Å

| atom | atom | distance | atom | atom | distance |
|------|------|----------|------|------|----------|
| Cl1  | C15  | 3.497(3) | N1   | C9   | 2.966(3) |
| N1   | C10  | 3.418(4) | N1   | C15  | 3.449(4) |
| N1   | C17  | 2.987(3) | N2   | C15  | 2.881(3) |
| N2   | C16  | 2.885(3) | N2   | C17  | 3.597(3) |
| N3   | C9   | 3.582(3) | N3   | C23  | 2.862(4) |
| N3   | C24  | 2.831(3) | C2   | C14  | 3.552(3) |
| C3   | C14  | 3.591(4) | C6   | C10  | 3.214(3) |
| C6   | C14  | 3.473(3) | C6   | C15  | 3.263(4) |
| C6   | C18  | 3.424(3) | C6   | C22  | 3.307(3) |
| C6   | C24  | 3.379(3) | C7   | C10  | 3.395(3) |
| C7   | C14  | 3.302(3) | C7   | C15  | 3.584(3) |
| C7   | C16  | 3.437(3) | C8   | C18  | 3.242(4) |
| C8   | C22  | 3.387(3) | C8   | C23  | 3.369(5) |
| C8   | C24  | 3.590(3) | C9   | C12  | 2.758(3) |
| C10  | C13  | 2.793(3) | C11  | C14  | 2.801(4) |
| C17  | C20  | 2.744(3) | C18  | C21  | 2.798(3) |
| C19  | C22  | 2.788(4) |      |      |          |

Table 10. Intramolecular contacts less than 3.60 Å involving hydrogens

| atom | atom | distance | atom | atom | distance |
|------|------|----------|------|------|----------|
| Ti1  | H14  | 3.546    | Cl1  | H1   | 3.086    |
| Cl1  | H2   | 3.402    | Cl1  | H14  | 2.826    |
| Cl1  | H15  | 3.581    | Cl2  | H4   | 3.411    |
| Cl2  | H5   | 3.087    | N1   | H2   | 3.507    |
| N1   | H3   | 2.933    | N1   | H14  | 2.754    |
| N1   | H24  | 3.351    | N1   | H27  | 3.021    |
| N2   | H3   | 3.431    | N2   | H8   | 2.878    |
| N2   | H9   | 3.108    | N2   | H13  | 2.795    |
| N2   | H14  | 2.863    | N2   | H16  | 2.523    |
| N2   | H17  | 3.226    | N3   | H6   | 2.882    |
| N3   | H7   | 3.112    | N3   | H23  | 3.090    |
| N3   | H24  | 2.564    | N3   | H25  | 2.808    |
| N3   | H27  | 2.737    | C1   | H3   | 3.180    |
| C1   | H4   | 3.116    | C2   | H4   | 3.111    |
| C2   | H5   | 3.176    | C3   | H1   | 3.203    |
| C3   | H5   | 3.193    | C3   | H16  | 3.337    |
| C4   | H1   | 3.198    | C4   | H2   | 3.202    |
| C5   | H2   | 3.202    | C5   | H3   | 3.181    |
| C6   | H3   | 3.283    | C6   | H6   | 2.897    |
| C6   | H7   | 3.091    | C6   | H8   | 2.908    |
| C6   | H9   | 3.074    | C6   | H13  | 3.295    |
| C6   | H14  | 2.814    | C6   | H16  | 3.173    |
| C6   | H24  | 2.971    | C6   | H25  | 3.480    |
| C6   | H27  | 2.872    | C7   | H13  | 3.082    |
| C7   | H16  | 3.108    | C7   | H17  | 3.361    |
| C8   | H23  | 3.148    | C8   | H24  | 3.183    |
| C8   | H25  | 3.151    | C9   | H2   | 3.081    |
| C9   | H3   | 3.354    | C9   | H6   | 2.828    |
| C9   | H7   | 2.785    | C9   | H10  | 3.257    |
| C9   | H12  | 3.257    | C9   | H13  | 2.758    |
| C9   | H14  | 2.799    | C9   | H15  | 3.321    |
| C9   | H16  | 2.648    | C9   | H17  | 2.995    |
| C9   | H18  | 3.285    | C10  | H2   | 3.257    |
| C10  | H6   | 3.312    | C10  | H11  | 3.271    |
| C11  | H2   | 3.199    | C11  | H12  | 3.247    |
| C11  | H13  | 3.157    | C11  | H14  | 3.136    |
| C11  | H15  | 2.565    | C12  | H2   | 3.018    |

Table 10. Intramolecular contacts less than 3.60 Å involving hydrogens (continued)

| atom | atom | distance | atom | atom | distance |
|------|------|----------|------|------|----------|
| C13  | H2   | 2.900    | C13  | H10  | 3.247    |
| C13  | H16  | 3.278    | C13  | H17  | 2.941    |
| C13  | H18  | 2.620    | C14  | H2   | 2.943    |
| C14  | H3   | 3.074    | C14  | H7   | 3.146    |
| C14  | H11  | 3.271    | C15  | H6   | 3.221    |
| C15  | H10  | 2.682    | C15  | H27  | 3.428    |
| C16  | H3   | 2.911    | C16  | H7   | 2.991    |
| C16  | H12  | 2.667    | C17  | H8   | 2.878    |
| C17  | H9   | 2.713    | C17  | H19  | 3.242    |
| C17  | H21  | 3.250    | C17  | H22  | 3.279    |
| C17  | H23  | 2.936    | C17  | H24  | 2.636    |
| C17  | H25  | 2.785    | C17  | H26  | 3.308    |
| C17  | H27  | 2.734    | C18  | H8   | 3.173    |
| C18  | H9   | 3.513    | C18  | H20  | 3.266    |
| C19  | H21  | 3.250    | C19  | H22  | 2.615    |
| C19  | H23  | 2.998    | C19  | H24  | 3.261    |
| C21  | H19  | 3.250    | C21  | H25  | 3.108    |
| C21  | H26  | 2.580    | C21  | H27  | 3.186    |
| C22  | H9   | 3.242    | C22  | H20  | 3.262    |
| C23  | H8   | 2.920    | C23  | H19  | 2.687    |
| C24  | H9   | 3.315    | C24  | H21  | 2.695    |
| H1   | H2   | 2.566    | H1   | H5   | 2.474    |
| H2   | H3   | 2.501    | H2   | H11  | 3.516    |
| H2   | H12  | 3.367    | H3   | H4   | 2.463    |
| H3   | H16  | 2.453    | H3   | H18  | 2.872    |
| H4   | H5   | 2.513    | H6   | H8   | 2.839    |
| H6   | H9   | 2.268    | H6   | H13  | 2.508    |
| H6   | H14  | 3.527    | H6   | H25  | 3.457    |
| H7   | H8   | 2.267    | H7   | H9   | 2.683    |
| H7   | H16  | 2.793    | H7   | H17  | 2.670    |
| H8   | H16  | 3.524    | H8   | H23  | 2.474    |
| H8   | H24  | 2.809    | H9   | H25  | 2.682    |
| H10  | H11  | 2.327    | H10  | H13  | 3.370    |
| H10  | H14  | 3.315    | H10  | H15  | 2.359    |
| H11  | H12  | 2.310    | H12  | H16  | 3.538    |
| H12  | H17  | 3.010    | H12  | H18  | 2.454    |
| H13  | H27  | 3.265    | H14  | H27  | 2.715    |

Table 10. Intramolecular contacts less than 3.60 Å involving hydrogens (continued)

| atom | atom | distance | atom | atom | distance |
|------|------|----------|------|------|----------|
| H16  | H24  | 3.591    | H19  | H20  | 2.316    |
| H19  | H22  | 2.445    | H19  | H23  | 3.100    |
| H19  | H24  | 3.525    | H20  | H21  | 2.325    |
| H21  | H25  | 3.307    | H21  | H26  | 2.383    |
| H21  | H27  | 3.400    |      |      |          |

Table 11. Intermolecular contacts less than 3.60 Å

| atom | atom             | distance | atom | atom             | distance |
|------|------------------|----------|------|------------------|----------|
| C7   | C20 <sup>1</sup> | 3.495(3) | C8   | C20 <sup>1</sup> | 3.282(3) |
| C8   | C21 <sup>1</sup> | 3.229(3) | C8   | C22 <sup>1</sup> | 3.501(3) |
| C15  | C23 <sup>2</sup> | 3.485(4) | C18  | C19 <sup>3</sup> | 3.555(4) |
| C19  | C18 <sup>3</sup> | 3.555(4) | C19  | C19 <sup>3</sup> | 3.134(4) |
| C19  | C20 <sup>3</sup> | 3.554(4) | C20  | C7 <sup>1</sup>  | 3.495(3) |
| C20  | C8 <sup>1</sup>  | 3.282(3) | C20  | C19 <sup>3</sup> | 3.554(4) |
| C20  | C23 <sup>3</sup> | 3.566(4) | C21  | C8 <sup>1</sup>  | 3.229(3) |
| C21  | C24 <sup>4</sup> | 3.424(3) | C22  | C8 <sup>1</sup>  | 3.501(3) |
| C23  | C15 <sup>5</sup> | 3.485(4) | C23  | C20 <sup>3</sup> | 3.566(4) |
| C24  | C21 <sup>4</sup> | 3.424(3) |      |                  |          |

Symmetry Operators:

- |                  |                  |
|------------------|------------------|
| (1) -X,-Y+1,-Z+1 | (2) X+1,Y,Z      |
| (3) -X,-Y,-Z+1   | (4) -X+1,-Y,-Z+1 |
| (5) X-1,Y,Z      |                  |

Table 12. Intermolecular contacts less than 3.60 Å involving hydrogens

| atom | atom              | distance | atom | atom              | distance |
|------|-------------------|----------|------|-------------------|----------|
| Ti1  | H21 <sup>1</sup>  | 3.584    | Cl1  | H4 <sup>2</sup>   | 3.201    |
| Cl1  | H7 <sup>3</sup>   | 2.787    | Cl1  | H11 <sup>4</sup>  | 2.834    |
| Cl1  | H17 <sup>3</sup>  | 2.941    | Cl1  | H20 <sup>1</sup>  | 3.426    |
| Cl1  | H21 <sup>1</sup>  | 3.203    | Cl2  | H6 <sup>5</sup>   | 3.036    |
| Cl2  | H8 <sup>3</sup>   | 3.412    | Cl2  | H13 <sup>5</sup>  | 3.235    |
| Cl2  | H19 <sup>6</sup>  | 2.888    | Cl2  | H21 <sup>1</sup>  | 3.168    |
| Cl2  | H23 <sup>3</sup>  | 3.304    | Cl2  | H26 <sup>1</sup>  | 2.926    |
| N1   | H21 <sup>1</sup>  | 3.474    | C1   | H10 <sup>4</sup>  | 3.503    |
| C1   | H11 <sup>4</sup>  | 3.232    | C1   | H12 <sup>7</sup>  | 3.357    |
| C1   | H17 <sup>3</sup>  | 3.552    | C1   | H18 <sup>7</sup>  | 2.883    |
| C2   | H10 <sup>4</sup>  | 3.302    | C2   | H11 <sup>4</sup>  | 3.300    |
| C2   | H12 <sup>7</sup>  | 3.569    | C2   | H18 <sup>7</sup>  | 3.244    |
| C3   | H12 <sup>7</sup>  | 3.287    | C3   | H15 <sup>8</sup>  | 3.560    |
| C4   | H6 <sup>5</sup>   | 3.565    | C4   | H7 <sup>5</sup>   | 3.561    |
| C4   | H12 <sup>7</sup>  | 2.892    | C5   | H6 <sup>5</sup>   | 3.502    |
| C5   | H12 <sup>7</sup>  | 2.924    | C5   | H18 <sup>7</sup>  | 3.442    |
| C7   | H4 <sup>9</sup>   | 3.496    | C7   | H5 <sup>9</sup>   | 3.488    |
| C7   | H20 <sup>10</sup> | 3.417    | C8   | H21 <sup>10</sup> | 3.533    |
| C9   | H5 <sup>9</sup>   | 3.147    | C10  | H5 <sup>9</sup>   | 2.925    |
| C11  | H1 <sup>4</sup>   | 3.497    | C11  | H2 <sup>4</sup>   | 3.422    |
| C11  | H5 <sup>9</sup>   | 3.232    | C11  | H11 <sup>4</sup>  | 3.355    |
| C12  | H1 <sup>4</sup>   | 3.240    | C12  | H2 <sup>4</sup>   | 3.449    |
| C12  | H10 <sup>4</sup>  | 3.461    | C12  | H17 <sup>11</sup> | 3.376    |
| C13  | H12 <sup>11</sup> | 3.561    | C13  | H17 <sup>11</sup> | 3.552    |
| C14  | H5 <sup>9</sup>   | 3.592    | C15  | H5 <sup>9</sup>   | 3.367    |
| C15  | H22 <sup>2</sup>  | 3.278    | C15  | H24 <sup>2</sup>  | 3.027    |
| C16  | H1 <sup>12</sup>  | 3.326    | C17  | H9 <sup>10</sup>  | 2.957    |
| C18  | H9 <sup>10</sup>  | 2.912    | C18  | H19 <sup>6</sup>  | 3.317    |
| C18  | H20 <sup>6</sup>  | 3.520    | C19  | H6 <sup>10</sup>  | 3.483    |
| C19  | H9 <sup>10</sup>  | 2.769    | C19  | H19 <sup>6</sup>  | 3.081    |
| C19  | H22 <sup>6</sup>  | 3.581    | C19  | H26 <sup>8</sup>  | 3.591    |
| C20  | H6 <sup>10</sup>  | 3.293    | C20  | H7 <sup>10</sup>  | 3.391    |
| C20  | H8 <sup>10</sup>  | 3.334    | C20  | H9 <sup>10</sup>  | 2.711    |
| C20  | H19 <sup>6</sup>  | 3.317    | C20  | H22 <sup>6</sup>  | 2.933    |
| C20  | H27 <sup>1</sup>  | 3.487    | C21  | H8 <sup>10</sup>  | 2.901    |
| C21  | H9 <sup>10</sup>  | 2.789    | C21  | H22 <sup>6</sup>  | 3.403    |
| C21  | H26 <sup>1</sup>  | 3.106    | C21  | H27 <sup>1</sup>  | 2.938    |



Table 12. Intermolecular contacts less than 3.60 Å involving hydrogens (continued)

| atom | atom              | distance | atom | atom              | distance |
|------|-------------------|----------|------|-------------------|----------|
| C22  | H8 <sup>10</sup>  | 3.173    | C22  | H9 <sup>10</sup>  | 2.910    |
| C22  | H21 <sup>1</sup>  | 3.597    | C22  | H26 <sup>1</sup>  | 3.346    |
| C23  | H13 <sup>8</sup>  | 3.138    | C23  | H14 <sup>8</sup>  | 3.421    |
| C23  | H15 <sup>8</sup>  | 3.323    | C23  | H20 <sup>6</sup>  | 3.194    |
| C23  | H25 <sup>8</sup>  | 3.472    | C23  | H26 <sup>8</sup>  | 3.462    |
| C23  | H27 <sup>8</sup>  | 3.312    | C24  | H19 <sup>2</sup>  | 3.550    |
| C24  | H21 <sup>1</sup>  | 3.148    | C24  | H22 <sup>2</sup>  | 2.764    |
| H1   | C11 <sup>4</sup>  | 3.497    | H1   | C12 <sup>4</sup>  | 3.240    |
| H1   | C16 <sup>3</sup>  | 3.326    | H1   | H1 <sup>13</sup>  | 3.408    |
| H1   | H10 <sup>4</sup>  | 3.174    | H1   | H11 <sup>4</sup>  | 2.686    |
| H1   | H17 <sup>3</sup>  | 2.733    | H1   | H18 <sup>3</sup>  | 3.169    |
| H1   | H18 <sup>7</sup>  | 2.941    | H2   | C11 <sup>4</sup>  | 3.422    |
| H2   | C12 <sup>4</sup>  | 3.449    | H2   | H10 <sup>4</sup>  | 2.775    |
| H2   | H11 <sup>4</sup>  | 2.827    | H2   | H18 <sup>7</sup>  | 3.585    |
| H3   | H10 <sup>8</sup>  | 3.241    | H3   | H15 <sup>8</sup>  | 2.870    |
| H4   | Cl1 <sup>8</sup>  | 3.201    | H4   | C7 <sup>5</sup>   | 3.496    |
| H4   | H6 <sup>5</sup>   | 3.126    | H4   | H7 <sup>5</sup>   | 2.945    |
| H4   | H12 <sup>7</sup>  | 3.159    | H4   | H15 <sup>8</sup>  | 3.416    |
| H4   | H20 <sup>6</sup>  | 2.865    | H5   | C7 <sup>5</sup>   | 3.488    |
| H5   | C9 <sup>5</sup>   | 3.147    | H5   | C10 <sup>5</sup>  | 2.925    |
| H5   | C11 <sup>5</sup>  | 3.232    | H5   | C14 <sup>5</sup>  | 3.592    |
| H5   | C15 <sup>5</sup>  | 3.367    | H5   | H6 <sup>5</sup>   | 2.958    |
| H5   | H7 <sup>5</sup>   | 3.426    | H5   | H12 <sup>7</sup>  | 3.245    |
| H5   | H13 <sup>5</sup>  | 2.957    | H6   | Cl2 <sup>9</sup>  | 3.036    |
| H6   | C4 <sup>9</sup>   | 3.565    | H6   | C5 <sup>9</sup>   | 3.502    |
| H6   | C19 <sup>10</sup> | 3.483    | H6   | C20 <sup>10</sup> | 3.293    |
| H6   | H4 <sup>9</sup>   | 3.126    | H6   | H5 <sup>9</sup>   | 2.958    |
| H6   | H19 <sup>10</sup> | 3.481    | H6   | H20 <sup>10</sup> | 3.159    |
| H7   | Cl1 <sup>12</sup> | 2.787    | H7   | C4 <sup>9</sup>   | 3.561    |
| H7   | C20 <sup>10</sup> | 3.391    | H7   | H4 <sup>9</sup>   | 2.945    |
| H7   | H5 <sup>9</sup>   | 3.426    | H7   | H20 <sup>10</sup> | 3.123    |
| H8   | Cl2 <sup>12</sup> | 3.412    | H8   | C20 <sup>10</sup> | 3.334    |
| H8   | C21 <sup>10</sup> | 2.901    | H8   | C22 <sup>10</sup> | 3.173    |
| H8   | H21 <sup>10</sup> | 2.994    | H8   | H25 <sup>10</sup> | 3.357    |
| H9   | C17 <sup>10</sup> | 2.957    | H9   | C18 <sup>10</sup> | 2.912    |
| H9   | C19 <sup>10</sup> | 2.769    | H9   | C20 <sup>10</sup> | 2.711    |
| H9   | C21 <sup>10</sup> | 2.789    | H9   | C22 <sup>10</sup> | 2.910    |

Table 12. Intermolecular contacts less than 3.60 Å involving hydrogens (continued)

| atom | atom              | distance | atom | atom              | distance |
|------|-------------------|----------|------|-------------------|----------|
| H9   | H9 <sup>10</sup>  | 3.284    | H9   | H19 <sup>10</sup> | 3.302    |
| H9   | H20 <sup>10</sup> | 3.222    | H9   | H21 <sup>10</sup> | 3.340    |
| H10  | C1 <sup>4</sup>   | 3.503    | H10  | C2 <sup>4</sup>   | 3.302    |
| H10  | C12 <sup>4</sup>  | 3.461    | H10  | H1 <sup>4</sup>   | 3.174    |
| H10  | H2 <sup>4</sup>   | 2.775    | H10  | H3 <sup>2</sup>   | 3.241    |
| H10  | H11 <sup>4</sup>  | 3.169    | H10  | H16 <sup>2</sup>  | 3.559    |
| H10  | H18 <sup>2</sup>  | 3.177    | H11  | Cl1 <sup>4</sup>  | 2.834    |
| H11  | C1 <sup>4</sup>   | 3.232    | H11  | C2 <sup>4</sup>   | 3.300    |
| H11  | C11 <sup>4</sup>  | 3.355    | H11  | H1 <sup>4</sup>   | 2.686    |
| H11  | H2 <sup>4</sup>   | 2.827    | H11  | H10 <sup>4</sup>  | 3.169    |
| H11  | H17 <sup>11</sup> | 2.980    | H12  | C1 <sup>7</sup>   | 3.357    |
| H12  | C2 <sup>7</sup>   | 3.569    | H12  | C3 <sup>7</sup>   | 3.287    |
| H12  | C4 <sup>7</sup>   | 2.892    | H12  | C5 <sup>7</sup>   | 2.924    |
| H12  | C13 <sup>11</sup> | 3.561    | H12  | H4 <sup>7</sup>   | 3.159    |
| H12  | H5 <sup>7</sup>   | 3.245    | H12  | H12 <sup>11</sup> | 3.486    |
| H12  | H17 <sup>11</sup> | 3.282    | H13  | Cl2 <sup>9</sup>  | 3.235    |
| H13  | C23 <sup>2</sup>  | 3.138    | H13  | H5 <sup>9</sup>   | 2.957    |
| H13  | H22 <sup>2</sup>  | 3.022    | H13  | H23 <sup>2</sup>  | 3.008    |
| H13  | H24 <sup>2</sup>  | 2.851    | H14  | C23 <sup>2</sup>  | 3.421    |
| H14  | H20 <sup>1</sup>  | 3.392    | H14  | H21 <sup>1</sup>  | 3.468    |
| H14  | H22 <sup>2</sup>  | 2.957    | H14  | H24 <sup>2</sup>  | 3.107    |
| H15  | C3 <sup>2</sup>   | 3.560    | H15  | C23 <sup>2</sup>  | 3.323    |
| H15  | H3 <sup>2</sup>   | 2.870    | H15  | H4 <sup>2</sup>   | 3.416    |
| H15  | H16 <sup>2</sup>  | 3.094    | H15  | H22 <sup>2</sup>  | 3.314    |
| H15  | H23 <sup>2</sup>  | 3.570    | H15  | H24 <sup>2</sup>  | 2.627    |
| H16  | H10 <sup>8</sup>  | 3.559    | H16  | H15 <sup>8</sup>  | 3.094    |
| H17  | Cl1 <sup>12</sup> | 2.941    | H17  | C1 <sup>12</sup>  | 3.552    |
| H17  | C12 <sup>11</sup> | 3.376    | H17  | C13 <sup>11</sup> | 3.552    |
| H17  | H1 <sup>12</sup>  | 2.733    | H17  | H11 <sup>11</sup> | 2.980    |
| H17  | H12 <sup>11</sup> | 3.282    | H18  | C1 <sup>7</sup>   | 2.883    |
| H18  | C2 <sup>7</sup>   | 3.244    | H18  | C5 <sup>7</sup>   | 3.442    |
| H18  | H1 <sup>12</sup>  | 3.169    | H18  | H1 <sup>7</sup>   | 2.941    |
| H18  | H2 <sup>7</sup>   | 3.585    | H18  | H10 <sup>8</sup>  | 3.177    |
| H19  | Cl2 <sup>6</sup>  | 2.888    | H19  | C18 <sup>6</sup>  | 3.317    |
| H19  | C19 <sup>6</sup>  | 3.081    | H19  | C20 <sup>6</sup>  | 3.317    |
| H19  | C24 <sup>8</sup>  | 3.550    | H19  | H6 <sup>10</sup>  | 3.481    |
| H19  | H9 <sup>10</sup>  | 3.302    | H19  | H19 <sup>6</sup>  | 3.311    |

Table 12. Intermolecular contacts less than 3.60 Å involving hydrogens (continued)

| atom | atom              | distance | atom | atom              | distance |
|------|-------------------|----------|------|-------------------|----------|
| H19  | H26 <sup>8</sup>  | 2.740    | H20  | Cl1 <sup>1</sup>  | 3.426    |
| H20  | C7 <sup>10</sup>  | 3.417    | H20  | C18 <sup>6</sup>  | 3.520    |
| H20  | C23 <sup>6</sup>  | 3.194    | H20  | H4 <sup>6</sup>   | 2.865    |
| H20  | H6 <sup>10</sup>  | 3.159    | H20  | H7 <sup>10</sup>  | 3.123    |
| H20  | H9 <sup>10</sup>  | 3.222    | H20  | H14 <sup>1</sup>  | 3.392    |
| H20  | H22 <sup>6</sup>  | 2.673    | H20  | H24 <sup>6</sup>  | 3.077    |
| H20  | H27 <sup>1</sup>  | 3.502    | H21  | Ti1 <sup>1</sup>  | 3.584    |
| H21  | Cl1 <sup>1</sup>  | 3.203    | H21  | Cl2 <sup>1</sup>  | 3.168    |
| H21  | N1 <sup>1</sup>   | 3.474    | H21  | C8 <sup>10</sup>  | 3.533    |
| H21  | C22 <sup>1</sup>  | 3.597    | H21  | C24 <sup>1</sup>  | 3.148    |
| H21  | H8 <sup>10</sup>  | 2.994    | H21  | H9 <sup>10</sup>  | 3.340    |
| H21  | H14 <sup>1</sup>  | 3.468    | H21  | H22 <sup>6</sup>  | 3.478    |
| H21  | H26 <sup>1</sup>  | 3.111    | H21  | H27 <sup>1</sup>  | 2.506    |
| H22  | C15 <sup>8</sup>  | 3.278    | H22  | C19 <sup>6</sup>  | 3.581    |
| H22  | C20 <sup>6</sup>  | 2.933    | H22  | C21 <sup>6</sup>  | 3.403    |
| H22  | C24 <sup>8</sup>  | 2.764    | H22  | H13 <sup>8</sup>  | 3.022    |
| H22  | H14 <sup>8</sup>  | 2.957    | H22  | H15 <sup>8</sup>  | 3.314    |
| H22  | H20 <sup>6</sup>  | 2.673    | H22  | H21 <sup>6</sup>  | 3.478    |
| H22  | H25 <sup>8</sup>  | 2.810    | H22  | H26 <sup>8</sup>  | 2.624    |
| H22  | H27 <sup>8</sup>  | 2.401    | H23  | Cl2 <sup>12</sup> | 3.304    |
| H23  | H13 <sup>8</sup>  | 3.008    | H23  | H15 <sup>8</sup>  | 3.570    |
| H23  | H25 <sup>8</sup>  | 3.243    | H23  | H25 <sup>10</sup> | 2.924    |
| H23  | H27 <sup>8</sup>  | 3.503    | H24  | C15 <sup>8</sup>  | 3.027    |
| H24  | H13 <sup>8</sup>  | 2.851    | H24  | H14 <sup>8</sup>  | 3.107    |
| H24  | H15 <sup>8</sup>  | 2.627    | H24  | H20 <sup>6</sup>  | 3.077    |
| H25  | C23 <sup>2</sup>  | 3.472    | H25  | H8 <sup>10</sup>  | 3.357    |
| H25  | H22 <sup>2</sup>  | 2.810    | H25  | H23 <sup>2</sup>  | 3.243    |
| H25  | H23 <sup>10</sup> | 2.924    | H26  | Cl2 <sup>1</sup>  | 2.926    |
| H26  | C19 <sup>2</sup>  | 3.591    | H26  | C21 <sup>1</sup>  | 3.106    |
| H26  | C22 <sup>1</sup>  | 3.346    | H26  | C23 <sup>2</sup>  | 3.462    |
| H26  | H19 <sup>2</sup>  | 2.740    | H26  | H21 <sup>1</sup>  | 3.111    |
| H26  | H22 <sup>2</sup>  | 2.624    | H27  | C20 <sup>1</sup>  | 3.487    |
| H27  | C21 <sup>1</sup>  | 2.938    | H27  | C23 <sup>2</sup>  | 3.312    |
| H27  | H20 <sup>1</sup>  | 3.502    | H27  | H21 <sup>1</sup>  | 2.506    |
| H27  | H22 <sup>2</sup>  | 2.401    | H27  | H23 <sup>2</sup>  | 3.503    |

Symmetry Operators:

- |                       |                     |
|-----------------------|---------------------|
| (1) $-X+1,-Y,-Z+1$    | (2) $X+1,Y,Z$       |
| (3) $X+1,Y-1,Z$       | (4) $-X+1,-Y,-Z+2$  |
| (5) $X,Y-1,Z$         | (6) $-X,-Y,-Z+1$    |
| (7) $-X,-Y,-Z+2$      | (8) $X-1,Y,Z$       |
| (9) $X,Y+1,Z$         | (10) $-X,-Y+1,-Z+1$ |
| (11) $-X,-Y+1,-Z+2$   | (12) $X-1,Y+1,Z$    |
| (13) $-X+1,-Y-1,-Z+2$ |                     |

X-ray Structure Report for CpTiCl<sub>2</sub>[1,3-Cy<sub>2</sub>(CH<sub>2</sub>N)<sub>2</sub>C=N] (**1c**)

September 7, 2010

## Experimental

### Data Collection

A yellow block crystal of  $C_{20}H_{31}Cl_2N_3Ti$  having approximate dimensions of 0.32 x 0.20 x 0.18 mm was mounted on a glass fiber. All measurements were made on a Rigaku RAXIS RAPID imaging plate area detector with graphite monochromated Mo- $K\alpha$  radiation.

Indexing was performed from 3 oscillations that were exposed for 60 seconds. The crystal-to-detector distance was 127.40 mm.

Cell constants and an orientation matrix for data collection corresponded to a primitive orthorhombic cell with dimensions:

$$\begin{aligned} a &= 9.0816(3) \text{ \AA} \\ b &= 12.7130(5) \text{ \AA} \\ c &= 18.7394(7) \text{ \AA} \\ V &= 2163.54(13) \text{ \AA}^3 \end{aligned}$$

For  $Z = 4$  and F.W. = 432.29, the calculated density is 1.327 g/cm<sup>3</sup>. The systematic absences of:

$$\begin{aligned} h00: & h \pm 2n \\ 0k0: & k \pm 2n \\ 00l: & l \pm 2n \end{aligned}$$

uniquely determine the space group to be:

$$P2_12_12_1 \text{ (#19)}$$

The data were collected at a temperature of  $-150 \pm 1^\circ\text{C}$  to a maximum  $2\theta$  value of  $55.0^\circ$ . A total of 111 oscillation images were collected. A sweep of data was done using  $\omega$  scans from  $130.0$  to  $190.0^\circ$  in  $2.0^\circ$  step, at  $\chi=45.0^\circ$  and  $\phi = 0.0^\circ$ . The exposure rate was 90.0 [sec./ $^\circ$ ]. A second sweep was performed using  $\omega$  scans from  $0.0$  to  $162.0^\circ$  in  $2.0^\circ$  step, at  $\chi=45.0^\circ$  and  $\phi = 180.0^\circ$ . The exposure rate was 90.0 [sec./ $^\circ$ ]. The crystal-to-detector distance was 127.40 mm. Readout was performed in the 0.100 mm pixel mode.

### Data Reduction

Of the 21288 reflections that were collected, 4941 were unique ( $R_{\text{int}} = 0.040$ ); equivalent reflections were merged.

The linear absorption coefficient,  $\mu$ , for Mo-K $\alpha$  radiation is 6.513 cm<sup>-1</sup>. An empirical absorption correction was applied which resulted in transmission factors ranging from 0.693 to 0.889. The data were corrected for Lorentz and polarization effects.

### Structure Solution and Refinement

The structure was solved by direct methods<sup>1</sup> and expanded using Fourier techniques<sup>2</sup>. The non-hydrogen atoms were refined anisotropically. Hydrogen atoms were refined using the riding model. The final cycle of full-matrix least-squares refinement<sup>3</sup> on  $F^2$  was based on 4941 observed reflections and 237 variable parameters and converged (largest parameter shift was 0.00 times its esd) with unweighted and weighted agreement factors of:

$$R1 = \sum ||F_o| - |F_c|| / \sum |F_o| = 0.0352$$

$$wR2 = [ \sum ( w (F_o^2 - F_c^2)^2 ) / \sum w(F_o^2)^2 ]^{1/2} = 0.0854$$

The standard deviation of an observation of unit weight<sup>4</sup> was 1.07. Unit weights were used. The maximum and minimum peaks on the final difference Fourier map corresponded to 0.24 and -0.42 e<sup>-</sup>/Å<sup>3</sup>, respectively. The absolute structure was deduced based on Flack parameter, 0.01(2), refined using 2141 Friedel pairs.<sup>5</sup>

Neutral atom scattering factors were taken from Cromer and Waber<sup>6</sup>. Anomalous dispersion effects were included in  $F_{\text{calc}}$ <sup>7</sup>; the values for  $\Delta f'$  and  $\Delta f''$  were those of Creagh and McAuley<sup>8</sup>. The values for the mass attenuation coefficients are those of Creagh and Hubbell<sup>9</sup>. All calculations were performed using the CrystalStructure<sup>10</sup> crystallographic software package except for refinement, which was performed using SHELXL-97<sup>11</sup>.

### References

(1) SIR92: Altomare, A., Cascarano, G., Giacovazzo, C., Guagliardi, A., Burla, M., Polidori, G., and Camalli, M. (1994) *J. Appl. Cryst.*, 27, 435.

(2) DIRDIF99: Beurskens, P.T., Admiraal, G., Beurskens, G., Bosman, W.P., de Gelder, R., Israel, R. and Smits, J.M.M.(1999). The DIRDIF-99 program system, Technical Report of the Crystallography Laboratory, University of Nijmegen, The Netherlands.

(3) Least Squares function minimized: (SHELXL97)

$$\sum w(F_o^2 - F_c^2)^2 \quad \text{where } w = \text{Least Squares weights.}$$

(4) Standard deviation of an observation of unit weight:

$$[\sum w(F_o^2 - F_c^2)^2 / (N_o - N_v)]^{1/2}$$

where:  $N_o$  = number of observations  
 $N_v$  = number of variables

(5) Flack, H. D. (1983), *Acta Cryst.* A39, 876-881.

(6) Cromer, D. T. & Waber, J. T.; "International Tables for X-ray Crystallography", Vol. IV, The Kynoch Press, Birmingham, England, Table 2.2 A (1974).

(7) Ibers, J. A. & Hamilton, W. C.; *Acta Crystallogr.*, 17, 781 (1964).

(8) Creagh, D. C. & McAuley, W.J. ; "International Tables for Crystallography", Vol C, (A.J.C. Wilson, ed.), Kluwer Academic Publishers, Boston, Table 4.2.6.8, pages 219-222 (1992).

(9) Creagh, D. C. & Hubbell, J.H.; "International Tables for Crystallography", Vol C, (A.J.C. Wilson, ed.), Kluwer Academic Publishers, Boston, Table 4.2.4.3, pages 200-206 (1992).

(10) CrystalStructure 3.8: Crystal Structure Analysis Package, Rigaku and Rigaku Americas (2000-2007). 9009 New Trails Dr. The Woodlands TX 77381 USA.

(11) SHELX97: Sheldrick, G.M. (1997).



## EXPERIMENTAL DETAILS

### A. Crystal Data

|                      |                                                                                           |
|----------------------|-------------------------------------------------------------------------------------------|
| Empirical Formula    | C <sub>20</sub> H <sub>31</sub> Cl <sub>2</sub> N <sub>3</sub> Ti                         |
| Formula Weight       | 432.29                                                                                    |
| Crystal Color, Habit | yellow, block                                                                             |
| Crystal Dimensions   | 0.32 X 0.20 X 0.18 mm                                                                     |
| Crystal System       | orthorhombic                                                                              |
| Lattice Type         | Primitive                                                                                 |
| Indexing Images      | 3 oscillations @ 60.0 seconds                                                             |
| Detector Position    | 127.40 mm                                                                                 |
| Pixel Size           | 0.100 mm                                                                                  |
| Lattice Parameters   | a = 9.0816(3) Å<br>b = 12.7130(5) Å<br>c = 18.7394(7) Å<br>V = 2163.54(13) Å <sup>3</sup> |
| Space Group          | P2 <sub>1</sub> 2 <sub>1</sub> 2 <sub>1</sub> (#19)                                       |
| Z value              | 4                                                                                         |
| D <sub>calc</sub>    | 1.327 g/cm <sup>3</sup>                                                                   |
| F <sub>000</sub>     | 912.00                                                                                    |
| μ(MoKα)              | 6.513 cm <sup>-1</sup>                                                                    |

## B. Intensity Measurements

|                                                        |                                                                                  |
|--------------------------------------------------------|----------------------------------------------------------------------------------|
| Diffractometer                                         | Rigaku RAXIS-RAPID                                                               |
| Radiation                                              | MoK $\alpha$ ( $\lambda = 0.71075 \text{ \AA}$ )<br>graphite monochromated       |
| Detector Aperture                                      | 280 mm x 256 mm                                                                  |
| Data Images                                            | 111 exposures                                                                    |
| $\omega$ oscillation Range ( $\chi=45.0, \phi=0.0$ )   | 130.0 - 190.0 $^\circ$                                                           |
| Exposure Rate                                          | 90.0 sec./ $^\circ$                                                              |
| $\omega$ oscillation Range ( $\chi=45.0, \phi=180.0$ ) | 0.0 - 162.0 $^\circ$                                                             |
| Exposure Rate                                          | 90.0 sec./ $^\circ$                                                              |
| Detector Position                                      | 127.40 mm                                                                        |
| Pixel Size                                             | 0.100 mm                                                                         |
| $2\theta_{\max}$                                       | 55.0 $^\circ$                                                                    |
| No. of Reflections Measured                            | Total: 21288<br>Unique: 4941 ( $R_{\text{int}} = 0.040$ )<br>Friedel pairs: 2141 |
| Corrections                                            | Lorentz-polarization<br>Absorption<br>(trans. factors: 0.693 - 0.889)            |

### C. Structure Solution and Refinement

|                                        |                                                                                                                      |
|----------------------------------------|----------------------------------------------------------------------------------------------------------------------|
| Structure Solution                     | Direct Methods (SIR92)                                                                                               |
| Refinement                             | Full-matrix least-squares on $F^2$                                                                                   |
| Function Minimized                     | $\sum w (F_o^2 - F_c^2)^2$                                                                                           |
| Least Squares Weights                  | $w = 1 / [ \sigma^2(F_o^2) + (0.0348 \cdot P)^2 + 1.0996 \cdot P ]$<br>where $P = (\text{Max}(F_o^2, 0) + 2F_c^2)/3$ |
| $2\theta_{\text{max}}$ cutoff          | 55.0°                                                                                                                |
| Anomalous Dispersion                   | All non-hydrogen atoms                                                                                               |
| No. Observations (All reflections)     | 4941                                                                                                                 |
| No. Variables                          | 237                                                                                                                  |
| Reflection/Parameter Ratio             | 20.85                                                                                                                |
| Residuals: R1 ( $I > 2.00\sigma(I)$ )  | 0.0352                                                                                                               |
| Residuals: R (All reflections)         | 0.0372                                                                                                               |
| Residuals: wR2 (All reflections)       | 0.0854                                                                                                               |
| Goodness of Fit Indicator              | 1.072                                                                                                                |
| Flack Parameter (Friedel pairs = 2141) | 0.01(2)                                                                                                              |
| Max Shift/Error in Final Cycle         | 0.001                                                                                                                |
| Maximum peak in Final Diff. Map        | 0.24 e <sup>-</sup> /Å <sup>3</sup>                                                                                  |
| Minimum peak in Final Diff. Map        | -0.42 e <sup>-</sup> /Å <sup>3</sup>                                                                                 |

Table 1. Atomic coordinates and  $B_{\text{iso}}/B_{\text{eq}}$

| atom  | x           | y            | z           | $B_{\text{eq}}$ |
|-------|-------------|--------------|-------------|-----------------|
| Ti(1) | 0.02906(4)  | 0.13329(3)   | 0.65777(2)  | 1.932(7)        |
| Cl(1) | -0.09192(6) | 0.28576(5)   | 0.62537(4)  | 2.910(11)       |
| Cl(2) | -0.11695(6) | -0.00230(5)  | 0.61501(3)  | 2.701(11)       |
| N(1)  | 0.18247(18) | 0.13264(15)  | 0.59995(9)  | 1.91(2)         |
| N(2)  | 0.3724(2)   | 0.04788(14)  | 0.53619(11) | 2.09(3)         |
| N(3)  | 0.4294(2)   | 0.19438(14)  | 0.59483(11) | 2.17(3)         |
| C(1)  | -0.0330(4)  | 0.0699(4)    | 0.77412(17) | 6.89(13)        |
| C(2)  | 0.1114(4)   | 0.0353(2)    | 0.75703(16) | 4.33(6)         |
| C(3)  | 0.1977(3)   | 0.1240(2)    | 0.75266(15) | 3.91(5)         |
| C(4)  | 0.1134(5)   | 0.2102(2)    | 0.76329(17) | 5.32(8)         |
| C(5)  | -0.0271(5)  | 0.1804(4)    | 0.77759(18) | 6.92(12)        |
| C(6)  | 0.3211(2)   | 0.12635(18)  | 0.57821(11) | 1.90(3)         |
| C(7)  | 0.5331(2)   | 0.05600(18)  | 0.52943(15) | 2.67(4)         |
| C(8)  | 0.5627(2)   | 0.16968(18)  | 0.55268(15) | 2.64(4)         |
| C(9)  | 0.2897(2)   | -0.04944(16) | 0.52497(12) | 1.87(3)         |
| C(10) | 0.3209(2)   | -0.13061(19) | 0.58293(12) | 2.31(3)         |
| C(11) | 0.2292(2)   | -0.23017(18) | 0.57034(12) | 2.48(3)         |
| C(12) | 0.2541(2)   | -0.27420(17) | 0.49599(13) | 2.40(3)         |
| C(13) | 0.2231(2)   | -0.19205(18) | 0.43927(13) | 2.52(4)         |
| C(14) | 0.3179(2)   | -0.09360(18) | 0.45045(12) | 2.21(3)         |
| C(15) | 0.4015(2)   | 0.29920(16)  | 0.62453(12) | 1.97(3)         |
| C(16) | 0.4969(2)   | 0.32094(18)  | 0.68968(12) | 2.36(3)         |
| C(17) | 0.4546(2)   | 0.42728(18)  | 0.72290(13) | 2.56(4)         |
| C(18) | 0.4649(2)   | 0.51540(18)  | 0.66819(13) | 2.75(4)         |
| C(19) | 0.3754(3)   | 0.49148(18)  | 0.60173(14) | 2.82(4)         |
| C(20) | 0.4188(2)   | 0.38582(17)  | 0.56928(13) | 2.41(3)         |

$$B_{\text{eq}} = 8/3 \pi^2 (U_{11}(aa^*)^2 + U_{22}(bb^*)^2 + U_{33}(cc^*)^2 + 2U_{12}(aa^*bb^*)\cos \gamma + 2U_{13}(aa^*cc^*)\cos \beta + 2U_{23}(bb^*cc^*)\cos \alpha)$$

Table 2. Atomic coordinates and  $B_{iso}$  involving hydrogens/ $B_{eq}$

| atom  | x       | y       | z      | $B_{eq}$ |
|-------|---------|---------|--------|----------|
| H(1)  | -0.1230 | 0.0243  | 0.7831 | 8.81     |
| H(2)  | 0.1285  | -0.0426 | 0.7531 | 2.37     |
| H(3)  | 0.3095  | 0.1267  | 0.7398 | 2.37     |
| H(4)  | 0.1680  | 0.2878  | 0.7555 | 2.37     |
| H(5)  | -0.1150 | 0.2327  | 0.7887 | 7.93     |
| H(6)  | 0.5651  | 0.0439  | 0.4796 | 3.20     |
| H(7)  | 0.5836  | 0.0052  | 0.5611 | 3.20     |
| H(8)  | 0.6528  | 0.1747  | 0.5822 | 3.16     |
| H(9)  | 0.5723  | 0.2170  | 0.5110 | 3.16     |
| H(10) | 0.1827  | -0.0314 | 0.5279 | 2.24     |
| H(11) | 0.2966  | -0.1006 | 0.6302 | 2.78     |
| H(12) | 0.4269  | -0.1488 | 0.5827 | 2.78     |
| H(13) | 0.2562  | -0.2840 | 0.6062 | 2.98     |
| H(14) | 0.1235  | -0.2135 | 0.5765 | 2.98     |
| H(15) | 0.3573  | -0.2984 | 0.4916 | 2.88     |
| H(16) | 0.1889  | -0.3356 | 0.4885 | 2.88     |
| H(17) | 0.1177  | -0.1723 | 0.4409 | 3.02     |
| H(18) | 0.2437  | -0.2221 | 0.3916 | 3.02     |
| H(19) | 0.4234  | -0.1118 | 0.4452 | 2.66     |
| H(20) | 0.2930  | -0.0400 | 0.4140 | 2.66     |
| H(21) | 0.2967  | 0.3004  | 0.6408 | 2.36     |
| H(22) | 0.6019  | 0.3221  | 0.6755 | 2.83     |
| H(23) | 0.4832  | 0.2642  | 0.7253 | 2.83     |
| H(24) | 0.3528  | 0.4234  | 0.7416 | 3.08     |
| H(25) | 0.5212  | 0.4427  | 0.7634 | 3.08     |
| H(26) | 0.4289  | 0.5816  | 0.6898 | 3.30     |
| H(27) | 0.5693  | 0.5258  | 0.6547 | 3.30     |
| H(28) | 0.3912  | 0.5478  | 0.5661 | 3.38     |
| H(29) | 0.2695  | 0.4904  | 0.6141 | 3.38     |
| H(30) | 0.3554  | 0.3706  | 0.5275 | 2.89     |
| H(31) | 0.5222  | 0.3887  | 0.5528 | 2.89     |

$$B_{eq} = 8/3 \pi^2 (U_{11}(aa^*)^2 + U_{22}(bb^*)^2 + U_{33}(cc^*)^2 + 2U_{12}(aa^*bb^*)\cos \gamma + 2U_{13}(aa^*cc^*)\cos \beta + 2U_{23}(bb^*cc^*)\cos \alpha)$$

Table 3. Anisotropic displacement parameters

| atom  | U <sub>11</sub> | U <sub>22</sub> | U <sub>33</sub> | U <sub>12</sub> | U <sub>13</sub> | U <sub>23</sub> |
|-------|-----------------|-----------------|-----------------|-----------------|-----------------|-----------------|
| Ti(1) | 0.01435(16)     | 0.03095(19)     | 0.02809(19)     | -0.00162(16)    | 0.00203(15)     | -0.00526(16)    |
| Cl(1) | 0.0228(2)       | 0.0317(2)       | 0.0561(3)       | 0.0041(2)       | 0.0013(2)       | -0.0074(2)      |
| Cl(2) | 0.0251(2)       | 0.0339(2)       | 0.0437(3)       | -0.0089(2)      | -0.0021(2)      | -0.0038(2)      |
| N(1)  | 0.0162(7)       | 0.0274(8)       | 0.0291(9)       | -0.0006(7)      | 0.0021(7)       | -0.0051(8)      |
| N(2)  | 0.0144(8)       | 0.0223(8)       | 0.0427(10)      | -0.0003(6)      | 0.0051(7)       | -0.0066(7)      |
| N(3)  | 0.0152(8)       | 0.0246(8)       | 0.0425(10)      | -0.0018(6)      | 0.0055(7)       | -0.0081(8)      |
| C(1)  | 0.064(2)        | 0.171(4)        | 0.0266(14)      | -0.069(3)       | 0.0020(16)      | 0.022(2)        |
| C(2)  | 0.088(2)        | 0.0455(15)      | 0.0308(13)      | -0.0088(17)     | -0.0044(16)     | 0.0076(11)      |
| C(3)  | 0.0391(13)      | 0.073(2)        | 0.0364(13)      | -0.0126(15)     | -0.0139(12)     | 0.0154(14)      |
| C(4)  | 0.110(3)        | 0.0555(19)      | 0.0366(15)      | -0.010(2)       | -0.024(2)       | -0.0090(13)     |
| C(5)  | 0.090(3)        | 0.144(4)        | 0.0287(15)      | 0.049(3)        | 0.0133(19)      | -0.016(2)       |
| C(6)  | 0.0172(9)       | 0.0256(10)      | 0.0295(10)      | 0.0007(8)       | 0.0005(8)       | -0.0018(8)      |
| C(7)  | 0.0174(10)      | 0.0285(11)      | 0.0553(15)      | -0.0026(9)      | 0.0100(11)      | -0.0123(10)     |
| C(8)  | 0.0141(10)      | 0.0301(11)      | 0.0560(15)      | -0.0017(8)      | 0.0061(10)      | -0.0088(10)     |
| C(9)  | 0.0197(9)       | 0.0222(10)      | 0.0290(11)      | -0.0019(8)      | 0.0024(8)       | -0.0020(8)      |
| C(10) | 0.0294(11)      | 0.0321(11)      | 0.0264(10)      | -0.0008(10)     | -0.0002(9)      | -0.0010(9)      |
| C(11) | 0.0338(12)      | 0.0280(11)      | 0.0326(11)      | 0.0007(10)      | 0.0062(10)      | 0.0029(9)       |
| C(12) | 0.0314(11)      | 0.0225(10)      | 0.0372(11)      | -0.0018(9)      | 0.0039(10)      | -0.0028(9)      |
| C(13) | 0.0342(12)      | 0.0318(11)      | 0.0296(11)      | -0.0042(10)     | 0.0009(10)      | -0.0034(9)      |
| C(14) | 0.0279(10)      | 0.0287(11)      | 0.0276(11)      | -0.0030(9)      | 0.0038(9)       | -0.0014(8)      |
| C(15) | 0.0161(9)       | 0.0233(10)      | 0.0353(11)      | 0.0009(7)       | 0.0017(9)       | -0.0053(8)      |
| C(16) | 0.0258(11)      | 0.0321(11)      | 0.0318(11)      | -0.0003(8)      | -0.0025(9)      | 0.0008(9)       |
| C(17) | 0.0280(12)      | 0.0351(12)      | 0.0343(11)      | -0.0022(10)     | -0.0010(10)     | -0.0056(9)      |
| C(18) | 0.0330(11)      | 0.0291(11)      | 0.0425(12)      | -0.0008(10)     | -0.0042(11)     | -0.0049(9)      |
| C(19) | 0.0384(12)      | 0.0270(11)      | 0.0417(13)      | 0.0049(10)      | -0.0058(11)     | -0.0016(10)     |
| C(20) | 0.0287(10)      | 0.0280(11)      | 0.0349(11)      | 0.0013(9)       | -0.0028(9)      | -0.0006(9)      |

The general temperature factor expression:  $\exp(-2\pi^2(a^2U_{11}h^2 + b^2U_{22}k^2 + c^2U_{33}l^2 + 2a^*b^*U_{12}hk + 2a^*c^*U_{13}hl + 2b^*c^*U_{23}kl))$

Table 4. Bond lengths (Å)

| atom  | atom  | distance   | atom  | atom  | distance  |
|-------|-------|------------|-------|-------|-----------|
| Ti(1) | Cl(1) | 2.3093(7)  | Ti(1) | Cl(2) | 2.3177(7) |
| Ti(1) | N(1)  | 1.7650(16) | Ti(1) | C(1)  | 2.392(3)  |
| Ti(1) | C(2)  | 2.360(3)   | Ti(1) | C(3)  | 2.350(2)  |
| Ti(1) | C(4)  | 2.335(3)   | Ti(1) | C(5)  | 2.379(3)  |
| N(1)  | C(6)  | 1.325(2)   | N(2)  | C(6)  | 1.354(2)  |
| N(2)  | C(7)  | 1.468(2)   | N(2)  | C(9)  | 1.462(2)  |
| N(3)  | C(6)  | 1.346(2)   | N(3)  | C(8)  | 1.480(3)  |
| N(3)  | C(15) | 1.466(2)   | C(1)  | C(2)  | 1.420(5)  |
| C(1)  | C(5)  | 1.407(8)   | C(2)  | C(3)  | 1.376(4)  |
| C(3)  | C(4)  | 1.351(5)   | C(4)  | C(5)  | 1.358(7)  |
| C(7)  | C(8)  | 1.533(3)   | C(9)  | C(10) | 1.525(3)  |
| C(9)  | C(14) | 1.527(3)   | C(10) | C(11) | 1.534(3)  |
| C(11) | C(12) | 1.518(3)   | C(12) | C(13) | 1.517(3)  |
| C(13) | C(14) | 1.534(3)   | C(15) | C(16) | 1.522(3)  |
| C(15) | C(20) | 1.520(3)   | C(16) | C(17) | 1.537(3)  |
| C(17) | C(18) | 1.521(3)   | C(18) | C(19) | 1.518(3)  |
| C(19) | C(20) | 1.526(3)   |       |       |           |

Table 5. Bond lengths involving hydrogens (Å)

| atom  | atom  | distance | atom  | atom  | distance |
|-------|-------|----------|-------|-------|----------|
| C(1)  | H(1)  | 1.016    | C(2)  | H(2)  | 1.006    |
| C(3)  | H(3)  | 1.044    | C(4)  | H(4)  | 1.114    |
| C(5)  | H(5)  | 1.059    | C(7)  | H(6)  | 0.990    |
| C(7)  | H(7)  | 0.990    | C(8)  | H(8)  | 0.990    |
| C(8)  | H(9)  | 0.990    | C(9)  | H(10) | 1.000    |
| C(10) | H(11) | 0.990    | C(10) | H(12) | 0.990    |
| C(11) | H(13) | 0.990    | C(11) | H(14) | 0.990    |
| C(12) | H(15) | 0.990    | C(12) | H(16) | 0.990    |
| C(13) | H(17) | 0.990    | C(13) | H(18) | 0.990    |
| C(14) | H(19) | 0.990    | C(14) | H(20) | 0.990    |
| C(15) | H(21) | 1.000    | C(16) | H(22) | 0.990    |
| C(16) | H(23) | 0.990    | C(17) | H(24) | 0.990    |
| C(17) | H(25) | 0.990    | C(18) | H(26) | 0.990    |
| C(18) | H(27) | 0.990    | C(19) | H(28) | 0.990    |
| C(19) | H(29) | 0.990    | C(20) | H(30) | 0.990    |
| C(20) | H(31) | 0.990    |       |       |          |



Table 6. Bond angles (°)

| atom  | atom  | atom  | angle      | atom  | atom  | atom  | angle      |
|-------|-------|-------|------------|-------|-------|-------|------------|
| Cl(1) | Ti(1) | Cl(2) | 105.14(2)  | Cl(1) | Ti(1) | N(1)  | 102.60(6)  |
| Cl(1) | Ti(1) | C(1)  | 114.22(12) | Cl(1) | Ti(1) | C(2)  | 143.21(8)  |
| Cl(1) | Ti(1) | C(3)  | 123.44(8)  | Cl(1) | Ti(1) | C(4)  | 91.56(9)   |
| Cl(1) | Ti(1) | C(5)  | 86.27(13)  | Cl(2) | Ti(1) | N(1)  | 103.64(6)  |
| Cl(2) | Ti(1) | C(1)  | 85.97(11)  | Cl(2) | Ti(1) | C(2)  | 93.52(8)   |
| Cl(2) | Ti(1) | C(3)  | 126.68(8)  | Cl(2) | Ti(1) | C(4)  | 142.36(9)  |
| Cl(2) | Ti(1) | C(5)  | 113.00(13) | N(1)  | Ti(1) | C(1)  | 138.08(12) |
| N(1)  | Ti(1) | C(2)  | 103.37(11) | N(1)  | Ti(1) | C(3)  | 87.12(8)   |
| N(1)  | Ti(1) | C(4)  | 105.24(13) | N(1)  | Ti(1) | C(5)  | 138.58(14) |
| C(1)  | Ti(1) | C(2)  | 34.77(14)  | C(1)  | Ti(1) | C(3)  | 56.43(12)  |
| C(1)  | Ti(1) | C(4)  | 56.39(15)  | C(1)  | Ti(1) | C(5)  | 34.29(19)  |
| C(2)  | Ti(1) | C(3)  | 33.97(12)  | C(2)  | Ti(1) | C(4)  | 56.60(11)  |
| C(2)  | Ti(1) | C(5)  | 57.11(15)  | C(3)  | Ti(1) | C(4)  | 33.52(13)  |
| C(3)  | Ti(1) | C(5)  | 55.82(14)  | C(4)  | Ti(1) | C(5)  | 33.48(17)  |
| Ti(1) | N(1)  | C(6)  | 159.82(15) | C(6)  | N(2)  | C(7)  | 109.90(17) |
| C(6)  | N(2)  | C(9)  | 122.05(18) | C(7)  | N(2)  | C(9)  | 123.86(17) |
| C(6)  | N(3)  | C(8)  | 109.76(18) | C(6)  | N(3)  | C(15) | 123.08(17) |
| C(8)  | N(3)  | C(15) | 122.46(17) | Ti(1) | C(1)  | C(2)  | 71.39(18)  |
| Ti(1) | C(1)  | C(5)  | 72.4(2)    | C(2)  | C(1)  | C(5)  | 106.5(3)   |
| Ti(1) | C(2)  | C(1)  | 73.8(2)    | Ti(1) | C(2)  | C(3)  | 72.61(17)  |
| C(1)  | C(2)  | C(3)  | 106.6(3)   | Ti(1) | C(3)  | C(2)  | 73.42(18)  |
| Ti(1) | C(3)  | C(4)  | 72.6(2)    | C(2)  | C(3)  | C(4)  | 109.4(3)   |
| Ti(1) | C(4)  | C(3)  | 73.84(18)  | Ti(1) | C(4)  | C(5)  | 75.0(2)    |
| C(3)  | C(4)  | C(5)  | 109.6(3)   | Ti(1) | C(5)  | C(1)  | 73.3(2)    |
| Ti(1) | C(5)  | C(4)  | 71.5(2)    | C(1)  | C(5)  | C(4)  | 107.8(4)   |
| N(1)  | C(6)  | N(2)  | 123.37(19) | N(1)  | C(6)  | N(3)  | 125.7(2)   |
| N(2)  | C(6)  | N(3)  | 110.91(17) | N(2)  | C(7)  | C(8)  | 102.49(17) |
| N(3)  | C(8)  | C(7)  | 102.00(17) | N(2)  | C(9)  | C(10) | 112.02(18) |
| N(2)  | C(9)  | C(14) | 110.89(18) | C(10) | C(9)  | C(14) | 111.81(17) |
| C(9)  | C(10) | C(11) | 110.37(18) | C(10) | C(11) | C(12) | 111.37(19) |
| C(11) | C(12) | C(13) | 111.19(18) | C(12) | C(13) | C(14) | 111.21(19) |
| C(9)  | C(14) | C(13) | 109.31(18) | N(3)  | C(15) | C(16) | 111.80(17) |
| N(3)  | C(15) | C(20) | 112.47(18) | C(16) | C(15) | C(20) | 110.87(17) |
| C(15) | C(16) | C(17) | 110.02(18) | C(16) | C(17) | C(18) | 111.06(19) |
| C(17) | C(18) | C(19) | 111.86(19) | C(18) | C(19) | C(20) | 111.4(2)   |
| C(15) | C(20) | C(19) | 109.87(19) |       |       |       |            |

Table 7. Bond angles involving hydrogens (°)

| atom  | atom  | atom  | angle | atom  | atom  | atom  | angle |
|-------|-------|-------|-------|-------|-------|-------|-------|
| Ti(1) | C(1)  | H(1)  | 122.2 | C(2)  | C(1)  | H(1)  | 127.1 |
| C(5)  | C(1)  | H(1)  | 126.4 | Ti(1) | C(2)  | H(2)  | 120.7 |
| C(1)  | C(2)  | H(2)  | 117.6 | C(3)  | C(2)  | H(2)  | 135.7 |
| Ti(1) | C(3)  | H(3)  | 117.2 | C(2)  | C(3)  | H(3)  | 126.5 |
| C(4)  | C(3)  | H(3)  | 124.0 | Ti(1) | C(4)  | H(4)  | 114.0 |
| C(3)  | C(4)  | H(4)  | 116.5 | C(5)  | C(4)  | H(4)  | 133.7 |
| Ti(1) | C(5)  | H(5)  | 120.4 | C(1)  | C(5)  | H(5)  | 127.4 |
| C(4)  | C(5)  | H(5)  | 124.8 | N(2)  | C(7)  | H(6)  | 111.3 |
| N(2)  | C(7)  | H(7)  | 111.3 | C(8)  | C(7)  | H(6)  | 111.3 |
| C(8)  | C(7)  | H(7)  | 111.3 | H(6)  | C(7)  | H(7)  | 109.2 |
| N(3)  | C(8)  | H(8)  | 111.4 | N(3)  | C(8)  | H(9)  | 111.4 |
| C(7)  | C(8)  | H(8)  | 111.4 | C(7)  | C(8)  | H(9)  | 111.4 |
| H(8)  | C(8)  | H(9)  | 109.2 | N(2)  | C(9)  | H(10) | 107.3 |
| C(10) | C(9)  | H(10) | 107.3 | C(14) | C(9)  | H(10) | 107.3 |
| C(9)  | C(10) | H(11) | 109.6 | C(9)  | C(10) | H(12) | 109.6 |
| C(11) | C(10) | H(11) | 109.6 | C(11) | C(10) | H(12) | 109.6 |
| H(11) | C(10) | H(12) | 108.1 | C(10) | C(11) | H(13) | 109.4 |
| C(10) | C(11) | H(14) | 109.4 | C(12) | C(11) | H(13) | 109.4 |
| C(12) | C(11) | H(14) | 109.3 | H(13) | C(11) | H(14) | 108.0 |
| C(11) | C(12) | H(15) | 109.4 | C(11) | C(12) | H(16) | 109.4 |
| C(13) | C(12) | H(15) | 109.4 | C(13) | C(12) | H(16) | 109.4 |
| H(15) | C(12) | H(16) | 108.0 | C(12) | C(13) | H(17) | 109.4 |
| C(12) | C(13) | H(18) | 109.4 | C(14) | C(13) | H(17) | 109.4 |
| C(14) | C(13) | H(18) | 109.4 | H(17) | C(13) | H(18) | 108.0 |
| C(9)  | C(14) | H(19) | 109.8 | C(9)  | C(14) | H(20) | 109.8 |
| C(13) | C(14) | H(19) | 109.8 | C(13) | C(14) | H(20) | 109.8 |
| H(19) | C(14) | H(20) | 108.3 | N(3)  | C(15) | H(21) | 107.1 |
| C(16) | C(15) | H(21) | 107.1 | C(20) | C(15) | H(21) | 107.1 |
| C(15) | C(16) | H(22) | 109.7 | C(15) | C(16) | H(23) | 109.7 |
| C(17) | C(16) | H(22) | 109.7 | C(17) | C(16) | H(23) | 109.7 |
| H(22) | C(16) | H(23) | 108.2 | C(16) | C(17) | H(24) | 109.4 |
| C(16) | C(17) | H(25) | 109.4 | C(18) | C(17) | H(24) | 109.4 |
| C(18) | C(17) | H(25) | 109.4 | H(24) | C(17) | H(25) | 108.0 |
| C(17) | C(18) | H(26) | 109.3 | C(17) | C(18) | H(27) | 109.2 |
| C(19) | C(18) | H(26) | 109.2 | C(19) | C(18) | H(27) | 109.2 |
| H(26) | C(18) | H(27) | 107.9 | C(18) | C(19) | H(28) | 109.3 |
| C(18) | C(19) | H(29) | 109.3 | C(20) | C(19) | H(28) | 109.3 |

Table 7. Bond angles involving hydrogens ( $^{\circ}$ ) (continued)

| atom  | atom  | atom  | angle | atom  | atom  | atom  | angle |
|-------|-------|-------|-------|-------|-------|-------|-------|
| C(20) | C(19) | H(29) | 109.3 | H(28) | C(19) | H(29) | 108.0 |
| C(15) | C(20) | H(30) | 109.7 | C(15) | C(20) | H(31) | 109.7 |
| C(19) | C(20) | H(30) | 109.7 | C(19) | C(20) | H(31) | 109.7 |
| H(30) | C(20) | H(31) | 108.2 |       |       |       |       |

Table 8. Torsion Angles(°)

| atom1 | atom2 | atom3 | atom4 | angle     | atom1 | atom2 | atom3 | atom4 | angle       |
|-------|-------|-------|-------|-----------|-------|-------|-------|-------|-------------|
| Cl(1) | Ti(1) | N(1)  | C(6)  | 130.1(4)  | Cl(1) | Ti(1) | C(1)  | C(2)  | -153.12(19) |
| Cl(1) | Ti(1) | C(1)  | C(5)  | -38.2(2)  | Cl(1) | Ti(1) | C(2)  | C(1)  | 43.5(3)     |
| Cl(1) | Ti(1) | C(2)  | C(3)  | -70.2(2)  | Cl(1) | Ti(1) | C(3)  | C(2)  | 137.52(17)  |
| Cl(1) | Ti(1) | C(3)  | C(4)  | 20.3(2)   | Cl(1) | Ti(1) | C(4)  | C(3)  | -163.1(2)   |
| Cl(1) | Ti(1) | C(4)  | C(5)  | 80.8(2)   | Cl(1) | Ti(1) | C(5)  | C(1)  | 145.6(2)    |
| Cl(1) | Ti(1) | C(5)  | C(4)  | -98.5(2)  | Cl(2) | Ti(1) | N(1)  | C(6)  | -120.6(4)   |
| Cl(2) | Ti(1) | C(1)  | C(2)  | 102.1(2)  | Cl(2) | Ti(1) | C(1)  | C(5)  | -143.0(2)   |
| Cl(2) | Ti(1) | C(2)  | C(1)  | -77.8(2)  | Cl(2) | Ti(1) | C(2)  | C(3)  | 168.49(18)  |
| Cl(2) | Ti(1) | C(3)  | C(2)  | -14.4(2)  | Cl(2) | Ti(1) | C(3)  | C(4)  | -131.6(2)   |
| Cl(2) | Ti(1) | C(4)  | C(3)  | 79.3(2)   | Cl(2) | Ti(1) | C(4)  | C(5)  | -36.8(3)    |
| Cl(2) | Ti(1) | C(5)  | C(1)  | 40.7(2)   | Cl(2) | Ti(1) | C(5)  | C(4)  | 156.6(2)    |
| N(1)  | Ti(1) | C(1)  | C(2)  | -3.9(3)   | N(1)  | Ti(1) | C(1)  | C(5)  | 111.0(3)    |
| C(1)  | Ti(1) | N(1)  | C(6)  | -21.3(5)  | N(1)  | Ti(1) | C(2)  | C(1)  | 177.3(2)    |
| N(1)  | Ti(1) | C(2)  | C(3)  | 63.57(19) | C(2)  | Ti(1) | N(1)  | C(6)  | -23.6(5)    |
| N(1)  | Ti(1) | C(3)  | C(2)  | -119.3(2) | N(1)  | Ti(1) | C(3)  | C(4)  | 123.5(2)    |
| C(3)  | Ti(1) | N(1)  | C(6)  | 6.5(5)    | N(1)  | Ti(1) | C(4)  | C(3)  | -59.6(2)    |
| N(1)  | Ti(1) | C(4)  | C(5)  | -175.7(2) | C(4)  | Ti(1) | N(1)  | C(6)  | 35.0(5)     |
| N(1)  | Ti(1) | C(5)  | C(1)  | -109.5(2) | N(1)  | Ti(1) | C(5)  | C(4)  | 6.3(4)      |
| C(5)  | Ti(1) | N(1)  | C(6)  | 31.4(5)   | C(1)  | Ti(1) | C(2)  | C(3)  | -113.7(3)   |
| C(2)  | Ti(1) | C(1)  | C(5)  | 114.9(3)  | C(1)  | Ti(1) | C(3)  | C(2)  | 38.8(2)     |
| C(1)  | Ti(1) | C(3)  | C(4)  | -78.4(2)  | C(3)  | Ti(1) | C(1)  | C(2)  | -37.9(2)    |
| C(3)  | Ti(1) | C(1)  | C(5)  | 77.1(2)   | C(1)  | Ti(1) | C(4)  | C(3)  | 78.5(2)     |
| C(1)  | Ti(1) | C(4)  | C(5)  | -37.5(2)  | C(4)  | Ti(1) | C(1)  | C(2)  | -78.4(2)    |
| C(4)  | Ti(1) | C(1)  | C(5)  | 36.6(2)   | C(1)  | Ti(1) | C(5)  | C(4)  | 115.9(4)    |
| C(5)  | Ti(1) | C(1)  | C(2)  | -114.9(3) | C(2)  | Ti(1) | C(3)  | C(4)  | -117.2(3)   |
| C(3)  | Ti(1) | C(2)  | C(1)  | 113.7(3)  | C(2)  | Ti(1) | C(4)  | C(3)  | 36.5(2)     |
| C(2)  | Ti(1) | C(4)  | C(5)  | -79.5(3)  | C(4)  | Ti(1) | C(2)  | C(1)  | 77.7(2)     |
| C(4)  | Ti(1) | C(2)  | C(3)  | -36.0(2)  | C(2)  | Ti(1) | C(5)  | C(1)  | -38.0(2)    |
| C(2)  | Ti(1) | C(5)  | C(4)  | 77.9(2)   | C(5)  | Ti(1) | C(2)  | C(1)  | 37.5(2)     |
| C(5)  | Ti(1) | C(2)  | C(3)  | -76.3(2)  | C(3)  | Ti(1) | C(4)  | C(5)  | -116.0(3)   |
| C(4)  | Ti(1) | C(3)  | C(2)  | 117.2(3)  | C(3)  | Ti(1) | C(5)  | C(1)  | -79.0(2)    |
| C(3)  | Ti(1) | C(5)  | C(4)  | 36.9(2)   | C(5)  | Ti(1) | C(3)  | C(2)  | 80.4(2)     |
| C(5)  | Ti(1) | C(3)  | C(4)  | -36.8(2)  | C(4)  | Ti(1) | C(5)  | C(1)  | -115.9(4)   |
| C(5)  | Ti(1) | C(4)  | C(3)  | 116.0(3)  | Ti(1) | N(1)  | C(6)  | N(2)  | 113.7(4)    |
| Ti(1) | N(1)  | C(6)  | N(3)  | -65.4(5)  | C(6)  | N(2)  | C(7)  | C(8)  | -18.0(2)    |
| C(7)  | N(2)  | C(6)  | N(1)  | -172.7(2) | C(7)  | N(2)  | C(6)  | N(3)  | 6.6(2)      |
| C(6)  | N(2)  | C(9)  | C(10) | -86.3(2)  | C(6)  | N(2)  | C(9)  | C(14) | 148.0(2)    |

Table 8. Torsion angles ( $^{\circ}$ ) (continued)

| atom1 | atom2 | atom3 | atom4 | angle       | atom1 | atom2 | atom3 | atom4 | angle       |
|-------|-------|-------|-------|-------------|-------|-------|-------|-------|-------------|
| C(9)  | N(2)  | C(6)  | N(1)  | -14.9(3)    | C(9)  | N(2)  | C(6)  | N(3)  | 164.36(19)  |
| C(7)  | N(2)  | C(9)  | C(10) | 68.3(2)     | C(7)  | N(2)  | C(9)  | C(14) | -57.4(2)    |
| C(9)  | N(2)  | C(7)  | C(8)  | -175.3(2)   | C(6)  | N(3)  | C(8)  | C(7)  | -19.1(2)    |
| C(8)  | N(3)  | C(6)  | N(1)  | -172.1(2)   | C(8)  | N(3)  | C(6)  | N(2)  | 8.6(2)      |
| C(6)  | N(3)  | C(15) | C(16) | 131.5(2)    | C(6)  | N(3)  | C(15) | C(20) | -103.0(2)   |
| C(15) | N(3)  | C(6)  | N(1)  | -16.0(3)    | C(15) | N(3)  | C(6)  | N(2)  | 164.79(19)  |
| C(8)  | N(3)  | C(15) | C(16) | -75.3(2)    | C(8)  | N(3)  | C(15) | C(20) | 50.2(2)     |
| C(15) | N(3)  | C(8)  | C(7)  | -175.41(19) | Ti(1) | C(1)  | C(2)  | C(3)  | 65.7(2)     |
| Ti(1) | C(1)  | C(5)  | C(4)  | -63.6(2)    | C(2)  | C(1)  | C(5)  | Ti(1) | 63.7(2)     |
| C(2)  | C(1)  | C(5)  | C(4)  | 0.0(3)      | C(5)  | C(1)  | C(2)  | Ti(1) | -64.3(2)    |
| C(5)  | C(1)  | C(2)  | C(3)  | 1.4(3)      | Ti(1) | C(2)  | C(3)  | C(4)  | 64.2(2)     |
| C(1)  | C(2)  | C(3)  | Ti(1) | -66.6(2)    | C(1)  | C(2)  | C(3)  | C(4)  | -2.4(3)     |
| Ti(1) | C(3)  | C(4)  | C(5)  | 67.1(2)     | C(2)  | C(3)  | C(4)  | Ti(1) | -64.7(2)    |
| C(2)  | C(3)  | C(4)  | C(5)  | 2.4(3)      | Ti(1) | C(4)  | C(5)  | C(1)  | 64.9(2)     |
| C(3)  | C(4)  | C(5)  | Ti(1) | -66.4(2)    | C(3)  | C(4)  | C(5)  | C(1)  | -1.5(3)     |
| N(2)  | C(7)  | C(8)  | N(3)  | 21.3(2)     | N(2)  | C(9)  | C(10) | C(11) | 178.49(17)  |
| N(2)  | C(9)  | C(14) | C(13) | -176.92(17) | C(10) | C(9)  | C(14) | C(13) | 57.3(2)     |
| C(14) | C(9)  | C(10) | C(11) | -56.3(2)    | C(9)  | C(10) | C(11) | C(12) | 54.8(2)     |
| C(10) | C(11) | C(12) | C(13) | -55.5(2)    | C(11) | C(12) | C(13) | C(14) | 57.0(2)     |
| C(12) | C(13) | C(14) | C(9)  | -57.2(2)    | N(3)  | C(15) | C(16) | C(17) | -175.04(17) |
| N(3)  | C(15) | C(20) | C(19) | 175.08(18)  | C(16) | C(15) | C(20) | C(19) | -58.9(2)    |
| C(20) | C(15) | C(16) | C(17) | 58.6(2)     | C(15) | C(16) | C(17) | C(18) | -55.7(2)    |
| C(16) | C(17) | C(18) | C(19) | 54.0(2)     | C(17) | C(18) | C(19) | C(20) | -54.7(2)    |
| C(18) | C(19) | C(20) | C(15) | 56.5(2)     |       |       |       |       |             |

The sign is positive if when looking from atom 2 to atom 3 a clock-wise motion of atom 1 would superimpose it on atom 4.

Table 9. Distances beyond the asymmetric unit out to 3.60 Å

| atom | atom                | distance | atom  | atom               | distance |
|------|---------------------|----------|-------|--------------------|----------|
| C(5) | C(11) <sup>1)</sup> | 3.575(4) | C(11) | C(5) <sup>2)</sup> | 3.575(4) |

Symmetry Operators:

(1)  $-X, Y+1/2, -Z+1/2+1$

(2)  $-X, Y+1/2-1, -Z+1/2+1$

Table 10. Distances beyond the asymmetric unit out to 3.60 Å involving hydrogens

| atom  | atom                | distance | atom  | atom                | distance |
|-------|---------------------|----------|-------|---------------------|----------|
| Cl(1) | H(2) <sup>1</sup>   | 3.171    | Cl(1) | H(6) <sup>2</sup>   | 3.255    |
| Cl(1) | H(8) <sup>3</sup>   | 2.833    | Cl(1) | H(9) <sup>2</sup>   | 2.959    |
| Cl(1) | H(20) <sup>2</sup>  | 3.477    | Cl(1) | H(22) <sup>3</sup>  | 2.971    |
| Cl(1) | H(30) <sup>2</sup>  | 3.520    | Cl(2) | H(7) <sup>3</sup>   | 2.903    |
| Cl(2) | H(8) <sup>3</sup>   | 3.132    | Cl(2) | H(15) <sup>4</sup>  | 3.235    |
| Cl(2) | H(16) <sup>4</sup>  | 3.334    | Cl(2) | H(24) <sup>5</sup>  | 3.564    |
| Cl(2) | H(28) <sup>2</sup>  | 3.444    | Cl(2) | H(30) <sup>2</sup>  | 3.163    |
| N(1)  | H(9) <sup>2</sup>   | 2.996    | N(1)  | H(31) <sup>2</sup>  | 3.222    |
| C(1)  | H(13) <sup>1</sup>  | 3.548    | C(1)  | H(19) <sup>6</sup>  | 3.399    |
| C(1)  | H(20) <sup>6</sup>  | 3.431    | C(1)  | H(24) <sup>5</sup>  | 3.463    |
| C(1)  | H(29) <sup>5</sup>  | 3.166    | C(2)  | H(20) <sup>6</sup>  | 3.068    |
| C(2)  | H(25) <sup>7</sup>  | 3.558    | C(2)  | H(27) <sup>7</sup>  | 3.340    |
| C(3)  | H(18) <sup>6</sup>  | 2.935    | C(3)  | H(20) <sup>6</sup>  | 3.209    |
| C(3)  | H(25) <sup>7</sup>  | 3.452    | C(3)  | H(26) <sup>7</sup>  | 3.598    |
| C(3)  | H(27) <sup>7</sup>  | 3.009    | C(4)  | H(18) <sup>6</sup>  | 2.736    |
| C(5)  | H(13) <sup>1</sup>  | 3.045    | C(5)  | H(14) <sup>1</sup>  | 3.172    |
| C(5)  | H(18) <sup>6</sup>  | 3.387    | C(5)  | H(19) <sup>6</sup>  | 3.393    |
| C(6)  | H(9) <sup>2</sup>   | 3.444    | C(7)  | H(16) <sup>8</sup>  | 3.157    |
| C(7)  | H(29) <sup>9</sup>  | 3.492    | C(7)  | H(30) <sup>9</sup>  | 3.253    |
| C(8)  | H(30) <sup>9</sup>  | 3.096    | C(9)  | H(31) <sup>2</sup>  | 3.493    |
| C(10) | H(5) <sup>5</sup>   | 3.507    | C(10) | H(25) <sup>7</sup>  | 3.349    |
| C(11) | H(5) <sup>5</sup>   | 2.876    | C(11) | H(15) <sup>4</sup>  | 3.590    |
| C(11) | H(19) <sup>4</sup>  | 3.440    | C(11) | H(28) <sup>10</sup> | 3.183    |
| C(12) | H(7) <sup>4</sup>   | 3.489    | C(12) | H(12) <sup>4</sup>  | 3.459    |
| C(12) | H(17) <sup>8</sup>  | 3.572    | C(12) | H(19) <sup>4</sup>  | 3.512    |
| C(12) | H(28) <sup>10</sup> | 2.897    | C(13) | H(12) <sup>4</sup>  | 3.391    |
| C(13) | H(15) <sup>4</sup>  | 3.567    | C(13) | H(27) <sup>2</sup>  | 3.085    |
| C(13) | H(28) <sup>2</sup>  | 3.529    | C(14) | H(27) <sup>2</sup>  | 3.118    |
| C(17) | H(1) <sup>1</sup>   | 3.257    | C(17) | H(3) <sup>11</sup>  | 3.392    |
| C(17) | H(11) <sup>11</sup> | 3.578    | C(18) | H(1) <sup>1</sup>   | 3.239    |
| C(18) | H(3) <sup>11</sup>  | 3.028    | C(18) | H(13) <sup>12</sup> | 3.384    |
| C(18) | H(17) <sup>9</sup>  | 3.176    | C(18) | H(20) <sup>9</sup>  | 3.369    |
| C(19) | H(1) <sup>1</sup>   | 3.177    | C(19) | H(6) <sup>2</sup>   | 3.236    |
| C(19) | H(13) <sup>12</sup> | 3.054    | C(19) | H(15) <sup>12</sup> | 3.379    |
| C(19) | H(16) <sup>12</sup> | 3.494    | C(19) | H(17) <sup>9</sup>  | 3.281    |
| C(20) | H(6) <sup>2</sup>   | 3.457    | C(20) | H(10) <sup>9</sup>  | 3.534    |
| H(1)  | C(17) <sup>5</sup>  | 3.257    | H(1)  | C(18) <sup>5</sup>  | 3.239    |

Table 10. Distances beyond the asymmetric unit out to 3.60 Å involving hydrogens  
(continued)

| atom  | atom                 | distance | atom  | atom                 | distance |
|-------|----------------------|----------|-------|----------------------|----------|
| H(1)  | C(19) <sup>5)</sup>  | 3.177    | H(1)  | H(4) <sup>5)</sup>   | 3.119    |
| H(1)  | H(13) <sup>1)</sup>  | 3.422    | H(1)  | H(21) <sup>5)</sup>  | 3.553    |
| H(1)  | H(24) <sup>5)</sup>  | 2.493    | H(1)  | H(26) <sup>5)</sup>  | 2.917    |
| H(1)  | H(29) <sup>5)</sup>  | 2.381    | H(2)  | Cl(1) <sup>5)</sup>  | 3.171    |
| H(2)  | H(4) <sup>5)</sup>   | 3.453    | H(2)  | H(5) <sup>5)</sup>   | 2.965    |
| H(2)  | H(20) <sup>6)</sup>  | 3.272    | H(2)  | H(22) <sup>7)</sup>  | 3.277    |
| H(2)  | H(25) <sup>7)</sup>  | 3.202    | H(2)  | H(27) <sup>7)</sup>  | 3.358    |
| H(3)  | C(17) <sup>7)</sup>  | 3.392    | H(3)  | C(18) <sup>7)</sup>  | 3.028    |
| H(3)  | H(18) <sup>6)</sup>  | 3.129    | H(3)  | H(20) <sup>6)</sup>  | 3.570    |
| H(3)  | H(25) <sup>7)</sup>  | 2.799    | H(3)  | H(26) <sup>7)</sup>  | 2.777    |
| H(3)  | H(27) <sup>7)</sup>  | 2.601    | H(4)  | H(1) <sup>1)</sup>   | 3.119    |
| H(4)  | H(2) <sup>1)</sup>   | 3.453    | H(4)  | H(18) <sup>6)</sup>  | 2.800    |
| H(5)  | C(10) <sup>1)</sup>  | 3.507    | H(5)  | C(11) <sup>1)</sup>  | 2.876    |
| H(5)  | H(2) <sup>1)</sup>   | 2.965    | H(5)  | H(11) <sup>1)</sup>  | 3.086    |
| H(5)  | H(13) <sup>1)</sup>  | 2.359    | H(5)  | H(14) <sup>1)</sup>  | 2.617    |
| H(5)  | H(22) <sup>3)</sup>  | 3.521    | H(5)  | H(26) <sup>5)</sup>  | 3.461    |
| H(6)  | Cl(1) <sup>9)</sup>  | 3.255    | H(6)  | C(19) <sup>9)</sup>  | 3.236    |
| H(6)  | C(20) <sup>9)</sup>  | 3.457    | H(6)  | H(16) <sup>8)</sup>  | 2.938    |
| H(6)  | H(28) <sup>9)</sup>  | 3.296    | H(6)  | H(29) <sup>9)</sup>  | 2.592    |
| H(6)  | H(30) <sup>9)</sup>  | 2.855    | H(7)  | Cl(2) <sup>13)</sup> | 2.903    |
| H(7)  | C(12) <sup>8)</sup>  | 3.489    | H(7)  | H(16) <sup>8)</sup>  | 2.535    |
| H(7)  | H(25) <sup>7)</sup>  | 3.514    | H(7)  | H(30) <sup>9)</sup>  | 3.369    |
| H(8)  | Cl(1) <sup>13)</sup> | 2.833    | H(8)  | Cl(2) <sup>13)</sup> | 3.132    |
| H(8)  | H(30) <sup>9)</sup>  | 2.819    | H(9)  | Cl(1) <sup>9)</sup>  | 2.959    |
| H(9)  | N(1) <sup>9)</sup>   | 2.996    | H(9)  | C(6) <sup>9)</sup>   | 3.444    |
| H(9)  | H(21) <sup>9)</sup>  | 3.506    | H(9)  | H(30) <sup>9)</sup>  | 2.893    |
| H(10) | C(20) <sup>2)</sup>  | 3.534    | H(10) | H(27) <sup>2)</sup>  | 3.573    |
| H(10) | H(28) <sup>2)</sup>  | 3.187    | H(10) | H(31) <sup>2)</sup>  | 2.775    |
| H(11) | C(17) <sup>7)</sup>  | 3.578    | H(11) | H(5) <sup>5)</sup>   | 3.086    |
| H(11) | H(25) <sup>7)</sup>  | 2.649    | H(12) | C(12) <sup>8)</sup>  | 3.459    |
| H(12) | C(13) <sup>8)</sup>  | 3.391    | H(12) | H(16) <sup>8)</sup>  | 2.735    |
| H(12) | H(17) <sup>8)</sup>  | 2.893    | H(12) | H(18) <sup>8)</sup>  | 3.347    |
| H(12) | H(25) <sup>7)</sup>  | 3.146    | H(13) | C(1) <sup>5)</sup>   | 3.548    |
| H(13) | C(5) <sup>5)</sup>   | 3.045    | H(13) | C(18) <sup>10)</sup> | 3.384    |
| H(13) | C(19) <sup>10)</sup> | 3.054    | H(13) | H(1) <sup>5)</sup>   | 3.422    |
| H(13) | H(5) <sup>5)</sup>   | 2.359    | H(13) | H(17) <sup>8)</sup>  | 3.445    |
| H(13) | H(19) <sup>4)</sup>  | 3.438    | H(13) | H(26) <sup>10)</sup> | 2.799    |



Table 10. Distances beyond the asymmetric unit out to 3.60 Å involving hydrogens (continued)

| atom  | atom                 | distance | atom  | atom                 | distance |
|-------|----------------------|----------|-------|----------------------|----------|
| H(13) | H(28) <sup>10)</sup> | 2.577    | H(13) | H(29) <sup>10)</sup> | 2.875    |
| H(14) | C(5) <sup>5)</sup>   | 3.172    | H(14) | H(5) <sup>5)</sup>   | 2.617    |
| H(14) | H(15) <sup>4)</sup>  | 2.738    | H(14) | H(18) <sup>4)</sup>  | 3.595    |
| H(14) | H(19) <sup>4)</sup>  | 2.899    | H(15) | Cl(2) <sup>8)</sup>  | 3.235    |
| H(15) | C(11) <sup>8)</sup>  | 3.590    | H(15) | C(13) <sup>8)</sup>  | 3.567    |
| H(15) | C(19) <sup>10)</sup> | 3.379    | H(15) | H(14) <sup>8)</sup>  | 2.738    |
| H(15) | H(16) <sup>8)</sup>  | 3.480    | H(15) | H(17) <sup>8)</sup>  | 2.707    |
| H(15) | H(28) <sup>10)</sup> | 2.421    | H(16) | Cl(2) <sup>8)</sup>  | 3.334    |
| H(16) | C(7) <sup>4)</sup>   | 3.157    | H(16) | C(19) <sup>10)</sup> | 3.494    |
| H(16) | H(6) <sup>4)</sup>   | 2.938    | H(16) | H(7) <sup>4)</sup>   | 2.535    |
| H(16) | H(12) <sup>4)</sup>  | 2.735    | H(16) | H(15) <sup>4)</sup>  | 3.480    |
| H(16) | H(19) <sup>4)</sup>  | 2.794    | H(16) | H(28) <sup>10)</sup> | 2.772    |
| H(16) | H(29) <sup>10)</sup> | 3.312    | H(17) | C(12) <sup>4)</sup>  | 3.572    |
| H(17) | C(18) <sup>2)</sup>  | 3.176    | H(17) | C(19) <sup>2)</sup>  | 3.281    |
| H(17) | H(12) <sup>4)</sup>  | 2.893    | H(17) | H(13) <sup>4)</sup>  | 3.445    |
| H(17) | H(15) <sup>4)</sup>  | 2.707    | H(17) | H(26) <sup>2)</sup>  | 3.205    |
| H(17) | H(27) <sup>2)</sup>  | 2.622    | H(17) | H(28) <sup>2)</sup>  | 2.599    |
| H(18) | C(3) <sup>14)</sup>  | 2.935    | H(18) | C(4) <sup>14)</sup>  | 2.736    |
| H(18) | C(5) <sup>14)</sup>  | 3.387    | H(18) | H(3) <sup>14)</sup>  | 3.129    |
| H(18) | H(4) <sup>14)</sup>  | 2.800    | H(18) | H(12) <sup>4)</sup>  | 3.347    |
| H(18) | H(14) <sup>8)</sup>  | 3.595    | H(18) | H(27) <sup>2)</sup>  | 3.080    |
| H(19) | C(1) <sup>14)</sup>  | 3.399    | H(19) | C(5) <sup>14)</sup>  | 3.393    |
| H(19) | C(11) <sup>8)</sup>  | 3.440    | H(19) | C(12) <sup>8)</sup>  | 3.512    |
| H(19) | H(13) <sup>8)</sup>  | 3.438    | H(19) | H(14) <sup>8)</sup>  | 2.899    |
| H(19) | H(16) <sup>8)</sup>  | 2.794    | H(20) | Cl(1) <sup>9)</sup>  | 3.477    |
| H(20) | C(1) <sup>14)</sup>  | 3.431    | H(20) | C(2) <sup>14)</sup>  | 3.068    |
| H(20) | C(3) <sup>14)</sup>  | 3.209    | H(20) | C(18) <sup>2)</sup>  | 3.369    |
| H(20) | H(2) <sup>14)</sup>  | 3.272    | H(20) | H(3) <sup>14)</sup>  | 3.570    |
| H(20) | H(27) <sup>2)</sup>  | 2.412    | H(20) | H(31) <sup>2)</sup>  | 3.184    |
| H(21) | H(1) <sup>1)</sup>   | 3.553    | H(21) | H(9) <sup>2)</sup>   | 3.506    |
| H(22) | Cl(1) <sup>13)</sup> | 2.971    | H(22) | H(2) <sup>11)</sup>  | 3.277    |
| H(22) | H(5) <sup>13)</sup>  | 3.521    | H(23) | H(26) <sup>7)</sup>  | 2.925    |
| H(24) | Cl(2) <sup>1)</sup>  | 3.564    | H(24) | C(1) <sup>1)</sup>   | 3.463    |
| H(24) | H(1) <sup>1)</sup>   | 2.493    | H(25) | C(2) <sup>11)</sup>  | 3.558    |
| H(25) | C(3) <sup>11)</sup>  | 3.452    | H(25) | C(10) <sup>11)</sup> | 3.349    |
| H(25) | H(2) <sup>11)</sup>  | 3.202    | H(25) | H(3) <sup>11)</sup>  | 2.799    |
| H(25) | H(7) <sup>11)</sup>  | 3.514    | H(25) | H(11) <sup>11)</sup> | 2.649    |

Table 10. Distances beyond the asymmetric unit out to 3.60 Å involving hydrogens (continued)

| atom  | atom                 | distance | atom  | atom                 | distance |
|-------|----------------------|----------|-------|----------------------|----------|
| H(25) | H(12) <sup>11)</sup> | 3.146    | H(26) | C(3) <sup>11)</sup>  | 3.598    |
| H(26) | H(1) <sup>1)</sup>   | 2.917    | H(26) | H(3) <sup>11)</sup>  | 2.777    |
| H(26) | H(5) <sup>1)</sup>   | 3.461    | H(26) | H(13) <sup>12)</sup> | 2.799    |
| H(26) | H(17) <sup>9)</sup>  | 3.205    | H(26) | H(23) <sup>11)</sup> | 2.925    |
| H(27) | C(2) <sup>11)</sup>  | 3.340    | H(27) | C(3) <sup>11)</sup>  | 3.009    |
| H(27) | C(13) <sup>9)</sup>  | 3.085    | H(27) | C(14) <sup>9)</sup>  | 3.118    |
| H(27) | H(2) <sup>11)</sup>  | 3.358    | H(27) | H(3) <sup>11)</sup>  | 2.601    |
| H(27) | H(10) <sup>9)</sup>  | 3.573    | H(27) | H(17) <sup>9)</sup>  | 2.622    |
| H(27) | H(18) <sup>9)</sup>  | 3.080    | H(27) | H(20) <sup>9)</sup>  | 2.412    |
| H(28) | Cl(2) <sup>9)</sup>  | 3.444    | H(28) | C(11) <sup>12)</sup> | 3.183    |
| H(28) | C(12) <sup>12)</sup> | 2.897    | H(28) | C(13) <sup>9)</sup>  | 3.529    |
| H(28) | H(6) <sup>2)</sup>   | 3.296    | H(28) | H(10) <sup>9)</sup>  | 3.187    |
| H(28) | H(13) <sup>12)</sup> | 2.577    | H(28) | H(15) <sup>12)</sup> | 2.421    |
| H(28) | H(16) <sup>12)</sup> | 2.772    | H(28) | H(17) <sup>9)</sup>  | 2.599    |
| H(29) | C(1) <sup>1)</sup>   | 3.166    | H(29) | C(7) <sup>2)</sup>   | 3.492    |
| H(29) | H(1) <sup>1)</sup>   | 2.381    | H(29) | H(6) <sup>2)</sup>   | 2.592    |
| H(29) | H(13) <sup>12)</sup> | 2.875    | H(29) | H(16) <sup>12)</sup> | 3.312    |
| H(30) | Cl(1) <sup>9)</sup>  | 3.520    | H(30) | Cl(2) <sup>9)</sup>  | 3.163    |
| H(30) | C(7) <sup>2)</sup>   | 3.253    | H(30) | C(8) <sup>2)</sup>   | 3.096    |
| H(30) | H(6) <sup>2)</sup>   | 2.855    | H(30) | H(7) <sup>2)</sup>   | 3.369    |
| H(30) | H(8) <sup>2)</sup>   | 2.819    | H(30) | H(9) <sup>2)</sup>   | 2.893    |
| H(31) | N(1) <sup>9)</sup>   | 3.222    | H(31) | C(9) <sup>9)</sup>   | 3.493    |
| H(31) | H(10) <sup>9)</sup>  | 2.775    | H(31) | H(20) <sup>9)</sup>  | 3.184    |

Symmetry Operators:

- |                           |                           |
|---------------------------|---------------------------|
| (1) -X,Y+1/2,-Z+1/2+1     | (2) X+1/2-1,-Y+1/2,-Z+1   |
| (3) X-1,Y,Z               | (4) X+1/2-1,-Y+1/2-1,-Z+1 |
| (5) -X,Y+1/2-1,-Z+1/2+1   | (6) -X+1/2,-Y,Z+1/2       |
| (7) -X+1,Y+1/2-1,-Z+1/2+1 | (8) X+1/2,-Y+1/2-1,-Z+1   |
| (9) X+1/2,-Y+1/2,-Z+1     | (10) X,Y-1,Z              |
| (11) -X+1,Y+1/2,-Z+1/2+1  | (12) X,Y+1,Z              |
| (13) X+1,Y,Z              | (14) -X+1/2,-Y,Z+1/2-1    |

X-ray Structure Report for CpTiCl<sub>2</sub>[1,3-<sup>t</sup>Bu<sub>2</sub>(CH<sub>2</sub>N)<sub>2</sub>C=N] (**1d**)

August 27, 2010

## Experimental

### Data Collection

A yellow block crystal of  $C_{16}H_{27}Cl_2N_3Ti$  having approximate dimensions of 0.48 x 0.16 x 0.16 mm was mounted on a glass fiber. All measurements were made on a Rigaku RAXIS RAPID imaging plate area detector with graphite monochromated Mo- $K\alpha$  radiation.

Indexing was performed from 3 oscillations that were exposed for 60 seconds. The crystal-to-detector distance was 127.40 mm.

Cell constants and an orientation matrix for data collection corresponded to a primitive orthorhombic cell with dimensions:

$$\begin{aligned} a &= 12.8021(3) \text{ \AA} \\ b &= 17.5227(4) \text{ \AA} \\ c &= 8.7440(2) \text{ \AA} \\ V &= 1961.53(8) \text{ \AA}^3 \end{aligned}$$

For  $Z = 4$  and F.W. = 380.22, the calculated density is 1.287 g/cm<sup>3</sup>. Based on the systematic absences of:

$$\begin{aligned} 0kl: & k+l \pm 2n \\ hk0: & h \pm 2n \end{aligned}$$

packing considerations, a statistical analysis of intensity distribution, and the successful solution and refinement of the structure, the space group was determined to be:

$$Pnma \text{ (#62)}$$

The data were collected at a temperature of  $-150 \pm 1^\circ\text{C}$  to a maximum  $2\theta$  value of  $54.9^\circ$ . A total of 74 oscillation images were collected. A sweep of data was done using  $\omega$  scans from  $130.0$  to  $190.0^\circ$  in  $3.0^\circ$  step, at  $\chi=45.0^\circ$  and  $\phi = 0.0^\circ$ . The exposure rate was 50.0 [sec./ $^\circ$ ]. A second sweep was performed using  $\omega$  scans from  $0.0$  to  $162.0^\circ$  in  $3.0^\circ$  step, at  $\chi=45.0^\circ$  and  $\phi = 180.0^\circ$ . The exposure rate was 50.0 [sec./ $^\circ$ ]. The crystal-to-detector distance was 127.40 mm. Readout was performed in the 0.100 mm pixel mode.

### Data Reduction

Of the 18393 reflections that were collected, 2310 were unique ( $R_{\text{int}} = 0.021$ ); equivalent reflections were merged.

The linear absorption coefficient,  $\mu$ , for Mo-K $\alpha$  radiation is 7.086 cm<sup>-1</sup>. An empirical absorption correction was applied which resulted in transmission factors ranging from 0.736 to 0.893. The data were corrected for Lorentz and polarization effects.

### Structure Solution and Refinement

The structure was solved by direct methods<sup>1</sup> and expanded using Fourier techniques<sup>2</sup>. The non-hydrogen atoms were refined anisotropically. Hydrogen atoms were refined using the riding model. The final cycle of full-matrix least-squares refinement<sup>3</sup> on  $F^2$  was based on 2310 observed reflections and 107 variable parameters and converged (largest parameter shift was 0.00 times its esd) with unweighted and weighted agreement factors of:

$$R1 = \sum ||F_o| - |F_c|| / \sum |F_o| = 0.0369$$

$$wR2 = [ \sum ( w (F_o^2 - F_c^2)^2 ) / \sum w(F_o^2)^2 ]^{1/2} = 0.0993$$

The standard deviation of an observation of unit weight<sup>4</sup> was 1.07. Unit weights were used. The maximum and minimum peaks on the final difference Fourier map corresponded to 0.65 and -0.53 e<sup>-</sup>/Å<sup>3</sup>, respectively.

Neutral atom scattering factors were taken from Cromer and Waber<sup>5</sup>. Anomalous dispersion effects were included in  $F_{\text{calc}}$ <sup>6</sup>; the values for  $\Delta f'$  and  $\Delta f''$  were those of Creagh and McAuley<sup>7</sup>. The values for the mass attenuation coefficients are those of Creagh and Hubbell<sup>8</sup>. All calculations were performed using the CrystalStructure<sup>9</sup> crystallographic software package except for refinement, which was performed using SHELXL-97<sup>10</sup>.

### References

(1) SIR92: Altomare, A., Cascarano, G., Giacovazzo, C., Guagliardi, A., Burla, M., Polidori, G., and Camalli, M. (1994) J. Appl. Cryst., 27, 435.

(2) DIRDIF99: Beurskens, P.T., Admiraal, G., Beurskens, G., Bosman, W.P., de Gelder, R., Israel, R. and Smits, J.M.M.(1999). The DIRDIF-99 program system, Technical Report of the Crystallography Laboratory, University of Nijmegen, The Netherlands.

(3) Least Squares function minimized: (SHELXL97)

$$\sum w(F_o^2 - F_c^2)^2 \quad \text{where } w = \text{Least Squares weights.}$$

(4) Standard deviation of an observation of unit weight:

$$[\sum w(F_o^2 - F_c^2)^2 / (N_o - N_v)]^{1/2}$$

where:  $N_o$  = number of observations  
 $N_v$  = number of variables

(5) Cromer, D. T. & Waber, J. T.; "International Tables for X-ray Crystallography", Vol. IV, The Kynoch Press, Birmingham, England, Table 2.2 A (1974).

(6) Ibers, J. A. & Hamilton, W. C.; Acta Crystallogr., 17, 781 (1964).

(7) Creagh, D. C. & McAuley, W.J. ; "International Tables for Crystallography", Vol C, (A.J.C. Wilson, ed.), Kluwer Academic Publishers, Boston, Table 4.2.6.8, pages 219-222 (1992).

(8) Creagh, D. C. & Hubbell, J.H.; "International Tables for Crystallography", Vol C, (A.J.C. Wilson, ed.), Kluwer Academic Publishers, Boston, Table 4.2.4.3, pages 200-206 (1992).

(9) CrystalStructure 3.8: Crystal Structure Analysis Package, Rigaku and Rigaku Americas (2000-2007). 9009 New Trails Dr. The Woodlands TX 77381 USA.

(10) SHELX97: Sheldrick, G.M. (1997).

## EXPERIMENTAL DETAILS

### A. Crystal Data

|                      |                                                                                          |
|----------------------|------------------------------------------------------------------------------------------|
| Empirical Formula    | C <sub>16</sub> H <sub>27</sub> Cl <sub>2</sub> N <sub>3</sub> Ti                        |
| Formula Weight       | 380.22                                                                                   |
| Crystal Color, Habit | yellow, block                                                                            |
| Crystal Dimensions   | 0.48 X 0.16 X 0.16 mm                                                                    |
| Crystal System       | orthorhombic                                                                             |
| Lattice Type         | Primitive                                                                                |
| Indexing Images      | 3 oscillations @ 60.0 seconds                                                            |
| Detector Position    | 127.40 mm                                                                                |
| Pixel Size           | 0.100 mm                                                                                 |
| Lattice Parameters   | a = 12.8021(3) Å<br>b = 17.5227(4) Å<br>c = 8.7440(2) Å<br>V = 1961.53(8) Å <sup>3</sup> |
| Space Group          | Pnma (#62)                                                                               |
| Z value              | 4                                                                                        |
| D <sub>calc</sub>    | 1.287 g/cm <sup>3</sup>                                                                  |
| F <sub>000</sub>     | 800.00                                                                                   |
| μ(MoKα)              | 7.086 cm <sup>-1</sup>                                                                   |

## B. Intensity Measurements

|                                                        |                                                                            |
|--------------------------------------------------------|----------------------------------------------------------------------------|
| Diffractometer                                         | Rigaku RAXIS-RAPID                                                         |
| Radiation                                              | MoK $\alpha$ ( $\lambda = 0.71075 \text{ \AA}$ )<br>graphite monochromated |
| Detector Aperture                                      | 280 mm x 256 mm                                                            |
| Data Images                                            | 74 exposures                                                               |
| $\omega$ oscillation Range ( $\chi=45.0, \phi=0.0$ )   | 130.0 - 190.0 $^\circ$                                                     |
| Exposure Rate                                          | 50.0 sec./ $^\circ$                                                        |
| $\omega$ oscillation Range ( $\chi=45.0, \phi=180.0$ ) | 0.0 - 162.0 $^\circ$                                                       |
| Exposure Rate                                          | 50.0 sec./ $^\circ$                                                        |
| Detector Position                                      | 127.40 mm                                                                  |
| Pixel Size                                             | 0.100 mm                                                                   |
| $2\theta_{\max}$                                       | 54.9 $^\circ$                                                              |
| No. of Reflections Measured                            | Total: 18393<br>Unique: 2310 ( $R_{\text{int}} = 0.021$ )                  |
| Corrections                                            | Lorentz-polarization<br>Absorption<br>(trans. factors: 0.736 - 0.893)      |



### C. Structure Solution and Refinement

|                                       |                                                                                                                      |
|---------------------------------------|----------------------------------------------------------------------------------------------------------------------|
| Structure Solution                    | Direct Methods (SIR92)                                                                                               |
| Refinement                            | Full-matrix least-squares on $F^2$                                                                                   |
| Function Minimized                    | $\sum w (F_o^2 - F_c^2)^2$                                                                                           |
| Least Squares Weights                 | $w = 1 / [ \sigma^2(F_o^2) + (0.0496 \cdot P)^2 + 1.9236 \cdot P ]$<br>where $P = (\text{Max}(F_o^2, 0) + 2F_c^2)/3$ |
| $2\theta_{\text{max}}$ cutoff         | 54.9°                                                                                                                |
| Anomalous Dispersion                  | All non-hydrogen atoms                                                                                               |
| No. Observations (All reflections)    | 2310                                                                                                                 |
| No. Variables                         | 107                                                                                                                  |
| Reflection/Parameter Ratio            | 21.59                                                                                                                |
| Residuals: R1 ( $I > 2.00\sigma(I)$ ) | 0.0369                                                                                                               |
| Residuals: R (All reflections)        | 0.0384                                                                                                               |
| Residuals: wR2 (All reflections)      | 0.0993                                                                                                               |
| Goodness of Fit Indicator             | 1.070                                                                                                                |
| Max Shift/Error in Final Cycle        | 0.001                                                                                                                |
| Maximum peak in Final Diff. Map       | 0.65 e <sup>-</sup> /Å <sup>3</sup>                                                                                  |
| Minimum peak in Final Diff. Map       | -0.53 e <sup>-</sup> /Å <sup>3</sup>                                                                                 |

Table 1. Atomic coordinates and  $B_{\text{iso}}/B_{\text{eq}}$  and occupancy

| atom  | x           | y           | z          | $B_{\text{eq}}$ | occ |
|-------|-------------|-------------|------------|-----------------|-----|
| Ti(1) | 0.52564(3)  | 0.2500      | 0.67414(4) | 1.472(10)       | 1/2 |
| Cl(1) | 0.63592(3)  | 0.35164(3)  | 0.62534(5) | 2.264(11)       |     |
| N(1)  | 0.43722(15) | 0.2500      | 0.5167(2)  | 1.55(3)         | 1/2 |
| N(2)  | 0.31548(14) | 0.18710(9)  | 0.3545(2)  | 2.83(3)         |     |
| C(1)  | 0.3860(3)   | 0.2500      | 0.8469(4)  | 4.72(9)         | 1/2 |
| C(2)  | 0.4441(2)   | 0.31288(18) | 0.8792(2)  | 5.23(7)         |     |
| C(3)  | 0.5396(2)   | 0.2889(2)   | 0.9368(2)  | 5.28(7)         |     |
| C(4)  | 0.36136(17) | 0.2500      | 0.4144(3)  | 1.43(3)         | 1/2 |
| C(5)  | 0.24340(14) | 0.20718(10) | 0.2338(2)  | 2.08(2)         |     |
| C(6)  | 0.35009(16) | 0.10620(10) | 0.3742(2)  | 2.78(3)         |     |
| C(7)  | 0.45925(19) | 0.09597(12) | 0.3072(2)  | 3.16(3)         |     |
| C(8)  | 0.34869(18) | 0.08373(12) | 0.5419(3)  | 3.57(4)         |     |
| C(9)  | 0.2725(2)   | 0.05498(13) | 0.2897(5)  | 7.94(13)        |     |

$$B_{\text{eq}} = 8/3 \pi^2 (U_{11}(aa^*)^2 + U_{22}(bb^*)^2 + U_{33}(cc^*)^2 + 2U_{12}(aa^*bb^*)\cos \gamma + 2U_{13}(aa^*cc^*)\cos \beta + 2U_{23}(bb^*cc^*)\cos \alpha)$$

Table 2. Atomic coordinates and  $B_{iso}$  involving hydrogens/ $B_{eq}$  and occupancy

| atom  | x      | y      | z      | $B_{eq}$ | occ |
|-------|--------|--------|--------|----------|-----|
| H(1)  | 0.3097 | 0.2500 | 0.8005 | 1.80     | 1/2 |
| H(2)  | 0.4081 | 0.3586 | 0.8444 | 1.80     |     |
| H(3)  | 0.6036 | 0.3232 | 0.9701 | 1.80     |     |
| H(4)  | 0.2669 | 0.1878 | 0.1379 | 2.54     |     |
| H(5)  | 0.1753 | 0.1878 | 0.2541 | 2.54     |     |
| H(6)  | 0.4792 | 0.0420 | 0.3127 | 3.79     |     |
| H(7)  | 0.5092 | 0.1267 | 0.3657 | 3.79     |     |
| H(8)  | 0.4594 | 0.1126 | 0.2002 | 3.79     |     |
| H(9)  | 0.3592 | 0.0285 | 0.5511 | 4.28     |     |
| H(10) | 0.2812 | 0.0976 | 0.5869 | 4.28     |     |
| H(11) | 0.4048 | 0.1105 | 0.5960 | 4.28     |     |
| H(12) | 0.2938 | 0.0015 | 0.3005 | 9.52     |     |
| H(13) | 0.2713 | 0.0688 | 0.1811 | 9.52     |     |
| H(14) | 0.2026 | 0.0618 | 0.3333 | 9.52     |     |

$$B_{eq} = 8/3 \pi^2 (U_{11}(aa^*)^2 + U_{22}(bb^*)^2 + U_{33}(cc^*)^2 + 2U_{12}(aa^*bb^*)\cos \gamma + 2U_{13}(aa^*cc^*)\cos \beta + 2U_{23}(bb^*cc^*)\cos \alpha)$$

Table 3. Anisotropic displacement parameters

| atom  | U <sub>11</sub> | U <sub>22</sub> | U <sub>33</sub> | U <sub>12</sub> | U <sub>13</sub> | U <sub>23</sub> |
|-------|-----------------|-----------------|-----------------|-----------------|-----------------|-----------------|
| Ti(1) | 0.0130(2)       | 0.0304(2)       | 0.0126(2)       | 0.0000          | -0.00106(14)    | 0.0000          |
| Cl(1) | 0.0242(2)       | 0.0326(2)       | 0.0292(2)       | -0.00700(16)    | -0.00150(16)    |                 |
|       | -0.00301(17)    |                 |                 |                 |                 |                 |
| N(1)  | 0.0190(9)       | 0.0229(9)       | 0.0171(8)       | 0.0000          | -0.0040(7)      | 0.0000          |
| N(2)  | 0.0389(9)       | 0.0174(7)       | 0.0512(10)      | -0.0008(6)      | -0.0304(8)      | -0.0002(6)      |
| C(1)  | 0.0269(14)      | 0.129(4)        | 0.0232(14)      | 0.0000          | 0.0102(12)      | 0.0000          |
| C(2)  | 0.103(2)        | 0.0694(18)      | 0.0264(11)      | 0.0316(18)      | 0.0278(13)      | -0.0027(11)     |
| C(3)  | 0.0578(14)      | 0.126(2)        | 0.0169(9)       | -0.0389(15)     | 0.0071(9)       | -0.0204(11)     |
| C(4)  | 0.0180(10)      | 0.0197(10)      | 0.0167(9)       | 0.0000          | -0.0019(8)      | 0.0000          |
| C(5)  | 0.0295(8)       | 0.0274(8)       | 0.0222(8)       | -0.0038(7)      | -0.0113(6)      | -0.0008(6)      |
| C(6)  | 0.0354(10)      | 0.0164(7)       | 0.0539(12)      | -0.0015(7)      | -0.0216(9)      | 0.0011(7)       |
| C(7)  | 0.0619(14)      | 0.0286(9)       | 0.0296(9)       | 0.0072(9)       | 0.0061(9)       | -0.0023(7)      |
| C(8)  | 0.0389(10)      | 0.0283(9)       | 0.0683(15)      | 0.0028(8)       | 0.0203(10)      | 0.0204(10)      |
| C(9)  | 0.098(2)        | 0.0192(10)      | 0.184(4)        | -0.0016(12)     | -0.102(2)       | -0.0099(16)     |

The general temperature factor expression:  $\exp(-2\pi^2(a^2U_{11}h^2 + b^2U_{22}k^2 + c^2U_{33}l^2 + 2a*b*U_{12}hk + 2a*c*U_{13}hl + 2b*c*U_{23}kl))$

Table 4. Bond lengths (Å)

| atom  | atom               | distance   | atom  | atom                | distance  |
|-------|--------------------|------------|-------|---------------------|-----------|
| Ti(1) | Cl(1)              | 2.3124(5)  | Ti(1) | Cl(1) <sup>1)</sup> | 2.3124(5) |
| Ti(1) | N(1)               | 1.7823(18) | Ti(1) | C(1)                | 2.340(3)  |
| Ti(1) | C(2)               | 2.350(2)   | Ti(1) | C(2) <sup>1)</sup>  | 2.350(2)  |
| Ti(1) | C(3)               | 2.403(2)   | Ti(1) | C(3) <sup>1)</sup>  | 2.403(2)  |
| N(1)  | C(4)               | 1.320(3)   | N(2)  | C(4)                | 1.354(2)  |
| N(2)  | C(5)               | 1.446(2)   | N(2)  | C(6)                | 1.495(2)  |
| C(1)  | C(2)               | 1.359(3)   | C(1)  | C(2) <sup>1)</sup>  | 1.359(3)  |
| C(2)  | C(3)               | 1.387(4)   | C(3)  | C(3) <sup>1)</sup>  | 1.364(4)  |
| C(5)  | C(5) <sup>1)</sup> | 1.501(2)   | C(6)  | C(7)                | 1.526(3)  |
| C(6)  | C(8)               | 1.519(3)   | C(6)  | C(9)                | 1.529(4)  |

Symmetry Operators:

(1) X,-Y+1/2,Z

Table 5. Bond lengths involving hydrogens (Å)

| atom | atom  | distance | atom | atom  | distance |
|------|-------|----------|------|-------|----------|
| C(5) | H(4)  | 0.953    | C(5) | H(5)  | 0.952    |
| C(7) | H(6)  | 0.980    | C(7) | H(7)  | 0.980    |
| C(7) | H(8)  | 0.980    | C(8) | H(9)  | 0.980    |
| C(8) | H(10) | 0.980    | C(8) | H(11) | 0.980    |
| C(9) | H(12) | 0.980    | C(9) | H(13) | 0.980    |
| C(9) | H(14) | 0.980    |      |       |          |

Table 6. Bond angles (°)

| atom                | atom  | atom                | angle      | atom                | atom  | atom               | angle      |
|---------------------|-------|---------------------|------------|---------------------|-------|--------------------|------------|
| Cl(1)               | Ti(1) | Cl(1) <sup>1)</sup> | 100.74(2)  | Cl(1)               | Ti(1) | N(1)               | 104.20(3)  |
| Cl(1)               | Ti(1) | C(1)                | 125.83(3)  | Cl(1)               | Ti(1) | C(2)               | 92.92(8)   |
| Cl(1)               | Ti(1) | C(2) <sup>1)</sup>  | 140.66(7)  | Cl(1)               | Ti(1) | C(3)               | 84.98(7)   |
| Cl(1)               | Ti(1) | C(3) <sup>1)</sup>  | 110.47(7)  | Cl(1) <sup>1)</sup> | Ti(1) | N(1)               | 104.20(3)  |
| Cl(1) <sup>1)</sup> | Ti(1) | C(1)                | 125.83(3)  | Cl(1) <sup>1)</sup> | Ti(1) | C(2)               | 140.66(7)  |
| Cl(1) <sup>1)</sup> | Ti(1) | C(2) <sup>1)</sup>  | 92.92(8)   | Cl(1) <sup>1)</sup> | Ti(1) | C(3)               | 110.47(7)  |
| Cl(1) <sup>1)</sup> | Ti(1) | C(3) <sup>1)</sup>  | 84.98(7)   | N(1)                | Ti(1) | C(1)               | 90.77(10)  |
| N(1)                | Ti(1) | C(2)                | 107.89(9)  | N(1)                | Ti(1) | C(2) <sup>1)</sup> | 107.89(9)  |
| N(1)                | Ti(1) | C(3)                | 141.77(8)  | N(1)                | Ti(1) | C(3) <sup>1)</sup> | 141.77(8)  |
| C(1)                | Ti(1) | C(2)                | 33.68(9)   | C(1)                | Ti(1) | C(2) <sup>1)</sup> | 33.68(9)   |
| C(1)                | Ti(1) | C(3)                | 55.92(10)  | C(1)                | Ti(1) | C(3) <sup>1)</sup> | 55.92(10)  |
| C(2)                | Ti(1) | C(2) <sup>1)</sup>  | 55.93(10)  | C(2)                | Ti(1) | C(3)               | 33.92(10)  |
| C(2)                | Ti(1) | C(3) <sup>1)</sup>  | 55.70(10)  | C(2) <sup>1)</sup>  | Ti(1) | C(3)               | 55.70(10)  |
| C(2) <sup>1)</sup>  | Ti(1) | C(3) <sup>1)</sup>  | 33.92(10)  | C(3)                | Ti(1) | C(3) <sup>1)</sup> | 32.98(11)  |
| Ti(1)               | N(1)  | C(4)                | 172.08(17) | C(4)                | N(2)  | C(5)               | 111.17(15) |
| C(4)                | N(2)  | C(6)                | 126.77(17) | C(5)                | N(2)  | C(6)               | 120.26(16) |
| Ti(1)               | C(1)  | C(2)                | 73.5(2)    | Ti(1)               | C(1)  | C(2) <sup>1)</sup> | 73.5(2)    |
| C(2)                | C(1)  | C(2) <sup>1)</sup>  | 108.4(3)   | Ti(1)               | C(2)  | C(1)               | 72.79(19)  |
| Ti(1)               | C(2)  | C(3)                | 75.14(17)  | C(1)                | C(2)  | C(3)               | 108.2(2)   |
| Ti(1)               | C(3)  | C(2)                | 70.94(14)  | Ti(1)               | C(3)  | C(3) <sup>1)</sup> | 73.51(14)  |
| C(2)                | C(3)  | C(3) <sup>1)</sup>  | 107.6(2)   | N(1)                | C(4)  | N(2)               | 125.52(11) |
| N(1)                | C(4)  | N(2) <sup>1)</sup>  | 125.52(11) | N(2)                | C(4)  | N(2) <sup>1)</sup> | 108.95(19) |
| N(2)                | C(5)  | C(5) <sup>1)</sup>  | 104.09(14) | N(2)                | C(6)  | C(7)               | 109.79(16) |
| N(2)                | C(6)  | C(8)                | 110.70(17) | N(2)                | C(6)  | C(9)               | 107.95(18) |
| C(7)                | C(6)  | C(8)                | 110.55(17) | C(7)                | C(6)  | C(9)               | 109.9(2)   |
| C(8)                | C(6)  | C(9)                | 107.9(2)   |                     |       |                    |            |

Symmetry Operators:

(1) X,-Y+1/2,Z

Table 7. Bond angles involving hydrogens (°)

| atom               | atom | atom  | angle | atom               | atom | atom  | angle |
|--------------------|------|-------|-------|--------------------|------|-------|-------|
| Ti(1)              | C(1) | H(1)  | 117.2 | C(2)               | C(1) | H(1)  | 125.8 |
| C(2) <sup>1)</sup> | C(1) | H(1)  | 125.8 | Ti(1)              | C(2) | H(2)  | 111.0 |
| C(1)               | C(2) | H(2)  | 110.1 | C(3)               | C(2) | H(2)  | 141.3 |
| Ti(1)              | C(3) | H(3)  | 118.8 | C(2)               | C(3) | H(3)  | 127.7 |
| C(3) <sup>1)</sup> | C(3) | H(3)  | 124.6 | N(2)               | C(5) | H(4)  | 110.7 |
| N(2)               | C(5) | H(5)  | 111.2 | C(5) <sup>1)</sup> | C(5) | H(4)  | 110.9 |
| C(5) <sup>1)</sup> | C(5) | H(5)  | 110.9 | H(4)               | C(5) | H(5)  | 109.0 |
| C(6)               | C(7) | H(6)  | 109.5 | C(6)               | C(7) | H(7)  | 109.5 |
| C(6)               | C(7) | H(8)  | 109.5 | H(6)               | C(7) | H(7)  | 109.5 |
| H(6)               | C(7) | H(8)  | 109.5 | H(7)               | C(7) | H(8)  | 109.5 |
| C(6)               | C(8) | H(9)  | 109.5 | C(6)               | C(8) | H(10) | 109.5 |
| C(6)               | C(8) | H(11) | 109.5 | H(9)               | C(8) | H(10) | 109.5 |
| H(9)               | C(8) | H(11) | 109.5 | H(10)              | C(8) | H(11) | 109.5 |
| C(6)               | C(9) | H(12) | 109.5 | C(6)               | C(9) | H(13) | 109.5 |
| C(6)               | C(9) | H(14) | 109.5 | H(12)              | C(9) | H(13) | 109.5 |
| H(12)              | C(9) | H(14) | 109.5 | H(13)              | C(9) | H(14) | 109.5 |

Symmetry Operators:

(1) X,-Y+1/2,Z



Table 8. Torsion Angles(°)

| atom1               | atom2 | atom3              | atom4              | angle        | atom1               | atom2 | atom3              | atom4              | angle       |
|---------------------|-------|--------------------|--------------------|--------------|---------------------|-------|--------------------|--------------------|-------------|
| Cl(1)               | Ti(1) | N(1)               | C(4)               | -127.397(19) | Cl(1)               | Ti(1) | C(1)               | C(2)               | -14.1(2)    |
| Cl(1)               | Ti(1) | C(1)               | C(2) <sup>1)</sup> | -129.54(14)  | Cl(1)               | Ti(1) | C(2)               | C(1)               | 168.61(17)  |
| Cl(1)               | Ti(1) | C(2)               | C(3)               | -76.53(18)   | Cl(1)               | Ti(1) | C(2) <sup>1)</sup> | C(3) <sup>1)</sup> | -34.4(2)    |
| Cl(1)               | Ti(1) | C(2) <sup>1)</sup> | C(1)               | 80.5(2)      | Cl(1)               | Ti(1) | C(3)               | C(2)               | 102.85(18)  |
| Cl(1)               | Ti(1) | C(3)               | C(3) <sup>1)</sup> | -141.29(16)  | Cl(1)               | Ti(1) | C(3) <sup>1)</sup> | C(2) <sup>1)</sup> | 157.54(16)  |
| Cl(1)               | Ti(1) | C(3) <sup>1)</sup> | C(3)               | 41.68(17)    | Cl(1) <sup>1)</sup> | Ti(1) | N(1)               | C(4)               | 127.397(19) |
| Cl(1) <sup>1)</sup> | Ti(1) | C(1)               | C(2)               | 129.54(14)   | Cl(1) <sup>1)</sup> | Ti(1) | C(1)               | C(2) <sup>1)</sup> | 14.1(2)     |
| Cl(1) <sup>1)</sup> | Ti(1) | C(2)               | C(1)               | -80.5(2)     | Cl(1) <sup>1)</sup> | Ti(1) | C(2)               | C(3)               | 34.4(2)     |
| Cl(1) <sup>1)</sup> | Ti(1) | C(2) <sup>1)</sup> | C(3) <sup>1)</sup> | 76.53(18)    | Cl(1) <sup>1)</sup> | Ti(1) | C(2) <sup>1)</sup> | C(1)               | -168.61(17) |
| Cl(1) <sup>1)</sup> | Ti(1) | C(3)               | C(2)               | -157.54(16)  | Cl(1) <sup>1)</sup> | Ti(1) | C(3)               | C(3) <sup>1)</sup> | -41.68(17)  |
| Cl(1) <sup>1)</sup> | Ti(1) | C(3) <sup>1)</sup> | C(2) <sup>1)</sup> | -102.85(18)  | Cl(1) <sup>1)</sup> | Ti(1) | C(3) <sup>1)</sup> | C(3)               | 141.29(16)  |
| N(1)                | Ti(1) | C(1)               | C(2)               | -122.27(17)  | N(1)                | Ti(1) | C(1)               | C(2) <sup>1)</sup> | 122.27(17)  |
| N(1)                | Ti(1) | C(2)               | C(1)               | 62.68(18)    | N(1)                | Ti(1) | C(2)               | C(3)               | 177.54(17)  |
| C(2)                | Ti(1) | N(1)               | C(4)               | -29.52(8)    | N(1)                | Ti(1) | C(2) <sup>1)</sup> | C(3) <sup>1)</sup> | -177.54(17) |
| N(1)                | Ti(1) | C(2) <sup>1)</sup> | C(1)               | -62.68(18)   | C(2) <sup>1)</sup>  | Ti(1) | N(1)               | C(4)               | 29.52(8)    |
| N(1)                | Ti(1) | C(3)               | C(2)               | -3.8(2)      | N(1)                | Ti(1) | C(3)               | C(3) <sup>1)</sup> | 112.07(17)  |
| C(3)                | Ti(1) | N(1)               | C(4)               | -27.30(13)   | N(1)                | Ti(1) | C(3) <sup>1)</sup> | C(2) <sup>1)</sup> | 3.8(2)      |
| N(1)                | Ti(1) | C(3) <sup>1)</sup> | C(3)               | -112.07(17)  | C(3) <sup>1)</sup>  | Ti(1) | N(1)               | C(4)               | 27.30(13)   |
| C(1)                | Ti(1) | C(2)               | C(3)               | 114.9(2)     | C(2)                | Ti(1) | C(1)               | C(2) <sup>1)</sup> | -115.5(2)   |
| C(1)                | Ti(1) | C(2) <sup>1)</sup> | C(3) <sup>1)</sup> | -114.9(2)    | C(2) <sup>1)</sup>  | Ti(1) | C(1)               | C(2)               | 115.5(2)    |
| C(1)                | Ti(1) | C(3)               | C(2)               | -37.41(16)   | C(1)                | Ti(1) | C(3)               | C(3) <sup>1)</sup> | 78.45(16)   |
| C(3)                | Ti(1) | C(1)               | C(2)               | 37.69(19)    | C(3)                | Ti(1) | C(1)               | C(2) <sup>1)</sup> | -77.8(2)    |
| C(1)                | Ti(1) | C(3) <sup>1)</sup> | C(2) <sup>1)</sup> | 37.41(16)    | C(1)                | Ti(1) | C(3) <sup>1)</sup> | C(3)               | -78.45(16)  |
| C(3) <sup>1)</sup>  | Ti(1) | C(1)               | C(2)               | 77.8(2)      | C(3) <sup>1)</sup>  | Ti(1) | C(1)               | C(2) <sup>1)</sup> | -37.69(19)  |
| C(2)                | Ti(1) | C(2) <sup>1)</sup> | C(3) <sup>1)</sup> | -77.7(2)     | C(2)                | Ti(1) | C(2) <sup>1)</sup> | C(1)               | 37.19(18)   |
| C(2) <sup>1)</sup>  | Ti(1) | C(2)               | C(1)               | -37.19(18)   | C(2) <sup>1)</sup>  | Ti(1) | C(2)               | C(3)               | 77.7(2)     |
| C(2)                | Ti(1) | C(3)               | C(3) <sup>1)</sup> | 115.9(2)     | C(3)                | Ti(1) | C(2)               | C(1)               | -114.9(2)   |
| C(2)                | Ti(1) | C(3) <sup>1)</sup> | C(2) <sup>1)</sup> | 78.4(2)      | C(2)                | Ti(1) | C(3) <sup>1)</sup> | C(3)               | -37.44(17)  |
| C(3) <sup>1)</sup>  | Ti(1) | C(2)               | C(1)               | -78.49(19)   | C(3) <sup>1)</sup>  | Ti(1) | C(2)               | C(3)               | 36.37(18)   |
| C(2) <sup>1)</sup>  | Ti(1) | C(3)               | C(2)               | -78.4(2)     | C(2) <sup>1)</sup>  | Ti(1) | C(3)               | C(3) <sup>1)</sup> | 37.44(17)   |
| C(3)                | Ti(1) | C(2) <sup>1)</sup> | C(3) <sup>1)</sup> | -36.37(18)   | C(3)                | Ti(1) | C(2) <sup>1)</sup> | C(1)               | 78.49(19)   |
| C(2) <sup>1)</sup>  | Ti(1) | C(3) <sup>1)</sup> | C(3)               | -115.9(2)    | C(3) <sup>1)</sup>  | Ti(1) | C(2) <sup>1)</sup> | C(1)               | 114.9(2)    |
| C(3)                | Ti(1) | C(3) <sup>1)</sup> | C(2) <sup>1)</sup> | 115.9(2)     | C(3) <sup>1)</sup>  | Ti(1) | C(3)               | C(2)               | -115.9(2)   |
| Ti(1)               | N(1)  | C(4)               | N(2)               | -89.3(2)     | Ti(1)               | N(1)  | C(4)               | N(2) <sup>1)</sup> | 89.3(2)     |
| C(4)                | N(2)  | C(5)               | C(5) <sup>1)</sup> | -4.4(2)      | C(5)                | N(2)  | C(4)               | N(1)               | -173.7(2)   |
| C(5)                | N(2)  | C(4)               | N(2) <sup>1)</sup> | 7.4(2)       | C(4)                | N(2)  | C(6)               | C(7)               | -61.8(2)    |
| C(4)                | N(2)  | C(6)               | C(8)               | 60.5(2)      | C(4)                | N(2)  | C(6)               | C(9)               | 178.3(2)    |

Table 8. Torsion angles ( $^{\circ}$ ) (continued)

| atom1              | atom2 | atom3              | atom4              | angle      | atom1              | atom2 | atom3              | atom4              | angle       |
|--------------------|-------|--------------------|--------------------|------------|--------------------|-------|--------------------|--------------------|-------------|
| C(6)               | N(2)  | C(4)               | N(1)               | -9.1(3)    | C(6)               | N(2)  | C(4)               | N(2) <sup>1)</sup> | 172.01(19)  |
| C(5)               | N(2)  | C(6)               | C(7)               | 101.5(2)   | C(5)               | N(2)  | C(6)               | C(8)               | -136.16(18) |
| C(5)               | N(2)  | C(6)               | C(9)               | -18.3(2)   | C(6)               | N(2)  | C(5)               | C(5) <sup>1)</sup> | -170.17(16) |
| Ti(1)              | C(1)  | C(2)               | C(3)               | -67.39(19) | Ti(1)              | C(1)  | C(2) <sup>1)</sup> | C(3) <sup>1)</sup> | 67.39(19)   |
| C(2)               | C(1)  | C(2) <sup>1)</sup> | Ti(1)              | -65.8(2)   | C(2)               | C(1)  | C(2) <sup>1)</sup> | C(3) <sup>1)</sup> | 1.6(3)      |
| C(2) <sup>1)</sup> | C(1)  | C(2)               | Ti(1)              | 65.8(2)    | C(2) <sup>1)</sup> | C(1)  | C(2)               | C(3)               | -1.6(3)     |
| Ti(1)              | C(2)  | C(3)               | C(3) <sup>1)</sup> | -64.86(17) | C(1)               | C(2)  | C(3)               | Ti(1)              | 65.8(2)     |
| C(1)               | C(2)  | C(3)               | C(3) <sup>1)</sup> | 1.0(3)     | Ti(1)              | C(3)  | C(3) <sup>1)</sup> | C(2) <sup>1)</sup> | -63.17(17)  |
| C(2)               | C(3)  | C(3) <sup>1)</sup> | Ti(1)              | 63.17(17)  |                    |       |                    |                    |             |

Symmetry Operators:

(1) X,-Y+1/2,Z

The sign is positive if when looking from atom 2 to atom 3 a clock-wise motion of atom 1 would superimpose it on atom 4.

Table 9. Distances beyond the asymmetric unit out to 3.60 Å

| atom  | atom               | distance   | atom | atom                | distance   |
|-------|--------------------|------------|------|---------------------|------------|
| Cl(1) | C(5) <sup>1)</sup> | 3.5797(18) | C(5) | Cl(1) <sup>2)</sup> | 3.5797(18) |

Symmetry Operators:

(1)  $X+1/2, -Y+1/2, -Z+1/2$

(2)  $X+1/2-1, -Y+1/2, -Z+1/2$

Table 10. Distances beyond the asymmetric unit out to 3.60 Å involving hydrogens

| atom  | atom                 | distance | atom  | atom                 | distance |
|-------|----------------------|----------|-------|----------------------|----------|
| Ti(1) | H(1)                 | 2.977    | Ti(1) | H(2)                 | 2.846    |
| Ti(1) | H(2) <sup>1)</sup>   | 2.846    | Ti(1) | H(3)                 | 3.056    |
| Ti(1) | H(3) <sup>1)</sup>   | 3.056    | Cl(1) | H(1) <sup>2)</sup>   | 2.923    |
| Cl(1) | H(2)                 | 3.491    | Cl(1) | H(2) <sup>3)</sup>   | 3.497    |
| Cl(1) | H(3)                 | 3.083    | Cl(1) | H(4) <sup>4)</sup>   | 2.931    |
| Cl(1) | H(5) <sup>4)</sup>   | 3.426    | Cl(1) | H(9) <sup>5)</sup>   | 3.463    |
| Cl(1) | H(10) <sup>2)</sup>  | 3.253    | Cl(1) | H(12) <sup>5)</sup>  | 2.851    |
| Cl(1) | H(13) <sup>4)</sup>  | 3.482    | N(1)  | H(1)                 | 2.970    |
| N(1)  | H(2)                 | 3.460    | N(1)  | H(2) <sup>1)</sup>   | 3.460    |
| N(2)  | H(3) <sup>6)</sup>   | 3.121    | C(1)  | H(1)                 | 1.058    |
| C(1)  | H(2)                 | 1.924    | C(1)  | H(2) <sup>1)</sup>   | 1.924    |
| C(1)  | H(3)                 | 3.251    | C(1)  | H(3) <sup>1)</sup>   | 3.251    |
| C(1)  | H(4) <sup>7)</sup>   | 3.160    | C(1)  | H(4) <sup>8)</sup>   | 3.160    |
| C(2)  | H(1)                 | 2.156    | C(2)  | H(2)                 | 0.973    |
| C(2)  | H(2) <sup>1)</sup>   | 3.055    | C(2)  | H(3)                 | 2.199    |
| C(2)  | H(3) <sup>1)</sup>   | 3.239    | C(2)  | H(4) <sup>8)</sup>   | 3.203    |
| C(2)  | H(8) <sup>8)</sup>   | 3.102    | C(3)  | H(1)                 | 3.247    |
| C(3)  | H(2)                 | 2.231    | C(3)  | H(2) <sup>1)</sup>   | 3.189    |
| C(3)  | H(3)                 | 1.057    | C(3)  | H(3) <sup>1)</sup>   | 2.149    |
| C(3)  | H(5) <sup>2)</sup>   | 3.239    | C(3)  | H(8) <sup>8)</sup>   | 3.055    |
| C(4)  | H(1)                 | 3.440    | C(5)  | H(3) <sup>6)</sup>   | 3.193    |
| C(5)  | H(7) <sup>9)</sup>   | 3.425    | C(7)  | H(5) <sup>10)</sup>  | 3.245    |
| C(7)  | H(9) <sup>11)</sup>  | 3.420    | C(7)  | H(14) <sup>10)</sup> | 3.402    |
| C(8)  | H(2) <sup>1)</sup>   | 2.932    | C(8)  | H(3) <sup>6)</sup>   | 3.538    |
| C(8)  | H(6) <sup>11)</sup>  | 3.366    | C(8)  | H(12) <sup>12)</sup> | 3.267    |
| C(8)  | H(13) <sup>12)</sup> | 3.314    | C(9)  | H(9) <sup>13)</sup>  | 3.055    |
| C(9)  | H(10) <sup>13)</sup> | 3.282    | H(1)  | Ti(1)                | 2.977    |
| H(1)  | Cl(1) <sup>6)</sup>  | 2.923    | H(1)  | Cl(1) <sup>14)</sup> | 2.923    |
| H(1)  | N(1)                 | 2.970    | H(1)  | C(1)                 | 1.058    |
| H(1)  | C(2)                 | 2.156    | H(1)  | C(2) <sup>1)</sup>   | 2.156    |
| H(1)  | C(3)                 | 3.247    | H(1)  | C(3) <sup>1)</sup>   | 3.247    |
| H(1)  | C(4)                 | 3.440    | H(1)  | H(2)                 | 2.314    |
| H(1)  | H(2) <sup>1)</sup>   | 2.314    | H(1)  | H(4) <sup>7)</sup>   | 3.193    |
| H(1)  | H(4) <sup>8)</sup>   | 3.193    | H(1)  | H(10)                | 3.279    |
| H(1)  | H(10) <sup>1)</sup>  | 3.279    | H(1)  | H(11)                | 3.264    |
| H(1)  | H(11) <sup>1)</sup>  | 3.264    | H(2)  | Ti(1)                | 2.846    |
| H(2)  | Cl(1)                | 3.491    | H(2)  | Cl(1) <sup>14)</sup> | 3.497    |

Table 10. Distances beyond the asymmetric unit out to 3.60 Å involving hydrogens  
(continued)

| atom  | atom                 | distance | atom  | atom                 | distance |
|-------|----------------------|----------|-------|----------------------|----------|
| H(2)  | N(1)                 | 3.460    | H(2)  | C(1)                 | 1.924    |
| H(2)  | C(2)                 | 0.973    | H(2)  | C(2) <sup>1)</sup>   | 3.055    |
| H(2)  | C(3)                 | 2.231    | H(2)  | C(3) <sup>1)</sup>   | 3.189    |
| H(2)  | C(8) <sup>1)</sup>   | 2.932    | H(2)  | H(1)                 | 2.314    |
| H(2)  | H(3)                 | 2.803    | H(2)  | H(4) <sup>8)</sup>   | 3.243    |
| H(2)  | H(8) <sup>8)</sup>   | 3.220    | H(2)  | H(9) <sup>1)</sup>   | 3.299    |
| H(2)  | H(10) <sup>1)</sup>  | 2.881    | H(2)  | H(11) <sup>1)</sup>  | 2.239    |
| H(3)  | Ti(1)                | 3.056    | H(3)  | Cl(1)                | 3.083    |
| H(3)  | N(2) <sup>2)</sup>   | 3.121    | H(3)  | C(1)                 | 3.251    |
| H(3)  | C(2)                 | 2.199    | H(3)  | C(2) <sup>1)</sup>   | 3.239    |
| H(3)  | C(3)                 | 1.057    | H(3)  | C(3) <sup>1)</sup>   | 2.149    |
| H(3)  | C(5) <sup>2)</sup>   | 3.193    | H(3)  | C(8) <sup>2)</sup>   | 3.538    |
| H(3)  | H(2)                 | 2.803    | H(3)  | H(3) <sup>1)</sup>   | 2.565    |
| H(3)  | H(5) <sup>2)</sup>   | 2.588    | H(3)  | H(5) <sup>3)</sup>   | 3.506    |
| H(3)  | H(8) <sup>8)</sup>   | 2.953    | H(3)  | H(10) <sup>2)</sup>  | 2.710    |
| H(3)  | H(14) <sup>2)</sup>  | 2.936    | H(4)  | Cl(1) <sup>15)</sup> | 2.931    |
| H(4)  | C(1) <sup>16)</sup>  | 3.160    | H(4)  | C(2) <sup>17)</sup>  | 3.203    |
| H(4)  | H(1) <sup>16)</sup>  | 3.193    | H(4)  | H(2) <sup>17)</sup>  | 3.243    |
| H(4)  | H(7) <sup>9)</sup>   | 3.468    | H(5)  | Cl(1) <sup>15)</sup> | 3.426    |
| H(5)  | C(3) <sup>6)</sup>   | 3.239    | H(5)  | C(7) <sup>9)</sup>   | 3.245    |
| H(5)  | H(3) <sup>6)</sup>   | 2.588    | H(5)  | H(3) <sup>14)</sup>  | 3.506    |
| H(5)  | H(7) <sup>9)</sup>   | 2.601    | H(5)  | H(8) <sup>9)</sup>   | 3.088    |
| H(6)  | C(8) <sup>11)</sup>  | 3.366    | H(6)  | H(9) <sup>11)</sup>  | 2.689    |
| H(6)  | H(11) <sup>11)</sup> | 3.161    | H(6)  | H(14) <sup>10)</sup> | 3.151    |
| H(7)  | C(5) <sup>10)</sup>  | 3.425    | H(7)  | H(4) <sup>10)</sup>  | 3.468    |
| H(7)  | H(5) <sup>10)</sup>  | 2.601    | H(7)  | H(9) <sup>11)</sup>  | 3.280    |
| H(7)  | H(13) <sup>10)</sup> | 3.528    | H(7)  | H(14) <sup>10)</sup> | 3.232    |
| H(8)  | C(2) <sup>17)</sup>  | 3.102    | H(8)  | C(3) <sup>17)</sup>  | 3.055    |
| H(8)  | H(2) <sup>17)</sup>  | 3.220    | H(8)  | H(3) <sup>17)</sup>  | 2.953    |
| H(8)  | H(5) <sup>10)</sup>  | 3.088    | H(8)  | H(14) <sup>10)</sup> | 3.251    |
| H(9)  | Cl(1) <sup>18)</sup> | 3.463    | H(9)  | C(7) <sup>11)</sup>  | 3.420    |
| H(9)  | C(9) <sup>12)</sup>  | 3.055    | H(9)  | H(2) <sup>1)</sup>   | 3.299    |
| H(9)  | H(6) <sup>11)</sup>  | 2.689    | H(9)  | H(7) <sup>11)</sup>  | 3.280    |
| H(9)  | H(12) <sup>12)</sup> | 2.978    | H(9)  | H(13) <sup>12)</sup> | 2.643    |
| H(9)  | H(14) <sup>12)</sup> | 3.037    | H(10) | Cl(1) <sup>6)</sup>  | 3.253    |
| H(10) | C(9) <sup>12)</sup>  | 3.282    | H(10) | H(1)                 | 3.279    |
| H(10) | H(2) <sup>1)</sup>   | 2.881    | H(10) | H(3) <sup>6)</sup>   | 2.710    |

Table 10. Distances beyond the asymmetric unit out to 3.60 Å involving hydrogens  
(continued)

| atom  | atom                 | distance | atom  | atom                 | distance |
|-------|----------------------|----------|-------|----------------------|----------|
| H(10) | H(12) <sup>12)</sup> | 2.726    | H(10) | H(13) <sup>12)</sup> | 3.103    |
| H(10) | H(14) <sup>12)</sup> | 3.535    | H(11) | H(1)                 | 3.264    |
| H(11) | H(2) <sup>1)</sup>   | 2.239    | H(11) | H(6) <sup>11)</sup>  | 3.161    |
| H(12) | Cl(1) <sup>18)</sup> | 2.851    | H(12) | C(8) <sup>13)</sup>  | 3.267    |
| H(12) | H(9) <sup>13)</sup>  | 2.978    | H(12) | H(10) <sup>13)</sup> | 2.726    |
| H(13) | Cl(1) <sup>15)</sup> | 3.482    | H(13) | C(8) <sup>13)</sup>  | 3.314    |
| H(13) | H(7) <sup>9)</sup>   | 3.528    | H(13) | H(9) <sup>13)</sup>  | 2.643    |
| H(13) | H(10) <sup>13)</sup> | 3.103    | H(14) | C(7) <sup>9)</sup>   | 3.402    |
| H(14) | H(3) <sup>6)</sup>   | 2.936    | H(14) | H(6) <sup>9)</sup>   | 3.151    |
| H(14) | H(7) <sup>9)</sup>   | 3.232    | H(14) | H(8) <sup>9)</sup>   | 3.251    |
| H(14) | H(9) <sup>13)</sup>  | 3.037    | H(14) | H(10) <sup>13)</sup> | 3.535    |

Symmetry Operators:

- |                            |                             |
|----------------------------|-----------------------------|
| (1) X,-Y+1/2,Z             | (2) X+1/2,-Y+1/2,-Z+1/2+1   |
| (3) X+1/2,Y,-Z+1/2+1       | (4) X+1/2,-Y+1/2,-Z+1/2     |
| (5) -X+1,Y+1/2,-Z+1        | (6) X+1/2-1,-Y+1/2,-Z+1/2+1 |
| (7) X,Y,Z+1                | (8) X,-Y+1/2,Z+1            |
| (9) X+1/2-1,Y,-Z+1/2       | (10) X+1/2,Y,-Z+1/2         |
| (11) -X+1,-Y,-Z+1          | (12) -X+1/2,-Y,Z+1/2        |
| (13) -X+1/2,-Y,Z+1/2-1     | (14) X+1/2-1,Y,-Z+1/2+1     |
| (15) X+1/2-1,-Y+1/2,-Z+1/2 | (16) X,Y,Z-1                |
| (17) X,-Y+1/2,Z-1          | (18) -X+1,Y+1/2-1,-Z+1      |
